# Supplementary material for: Quantitative phosphoproteomics reveals the role of the AMPK plant ortholog SnRK1 as a metabolic master regulator under energy deprivation
Source: Springer Nature journal article supplement (doi:10.1038/srep31697), 2016-08-22
Supplement: 41598_2016_BFsrep31697_MOESM59_ESM.pdf [file 41598_2016_BFsrep31697_MOESM59_ESM.pdf]

## **Quantitative phosphoproteomics reveals the role of SnRK1 as metabolic master regulator under energy deprivation**

Ella Nukarinen<sup>1,\*</sup>, Thomas Nägele<sup>1,2,\*</sup>, Lorenzo Pedrotti<sup>3,\*</sup>, Bernhard Wurzinger<sup>1</sup>, Andrea Mair<sup>1</sup>, Ramona Landgraf<sup>4</sup>, Frederik Börnke<sup>4,5</sup>, Johannes Hanson<sup>6</sup>, Markus Teige<sup>1</sup>, Elena Baena-Gonzalez<sup>7</sup>, Wolfgang Dröge-Laser<sup>3</sup>, Wolfram Weckwerth<sup>1,2</sup>

<sup>1</sup> Department of Ecogenomics and Systems Biology, University of Vienna, Vienna, Austria

<sup>2</sup> Vienna Metabolomics Center (VIME), University of Vienna, Vienna, Austria

<sup>3</sup> Julius-von-Sachs-Institut, Julius-Maximilians-Universität Würzburg, Würzburg, Germany

<sup>4</sup> Plant Health, Plant Metabolism Group, Leibniz-Institute of Vegetable and Ornamental Crops, Großbeeren, Germany

<sup>5</sup> Institute of Biochemistry and Biology, University of Potsdam, Potsdam, Germany

<sup>6</sup> Department of Plant Physiology, Umeå University, Umeå, Sweden

<sup>7</sup> Instituto Gulbenkian de Ciência, Oeiras, Portugal

\* These authors contributed equally to this work

Correspondence and requests for materials should be addressed to W.W. (email: wolfram.weckwerth@univie.ac.at)

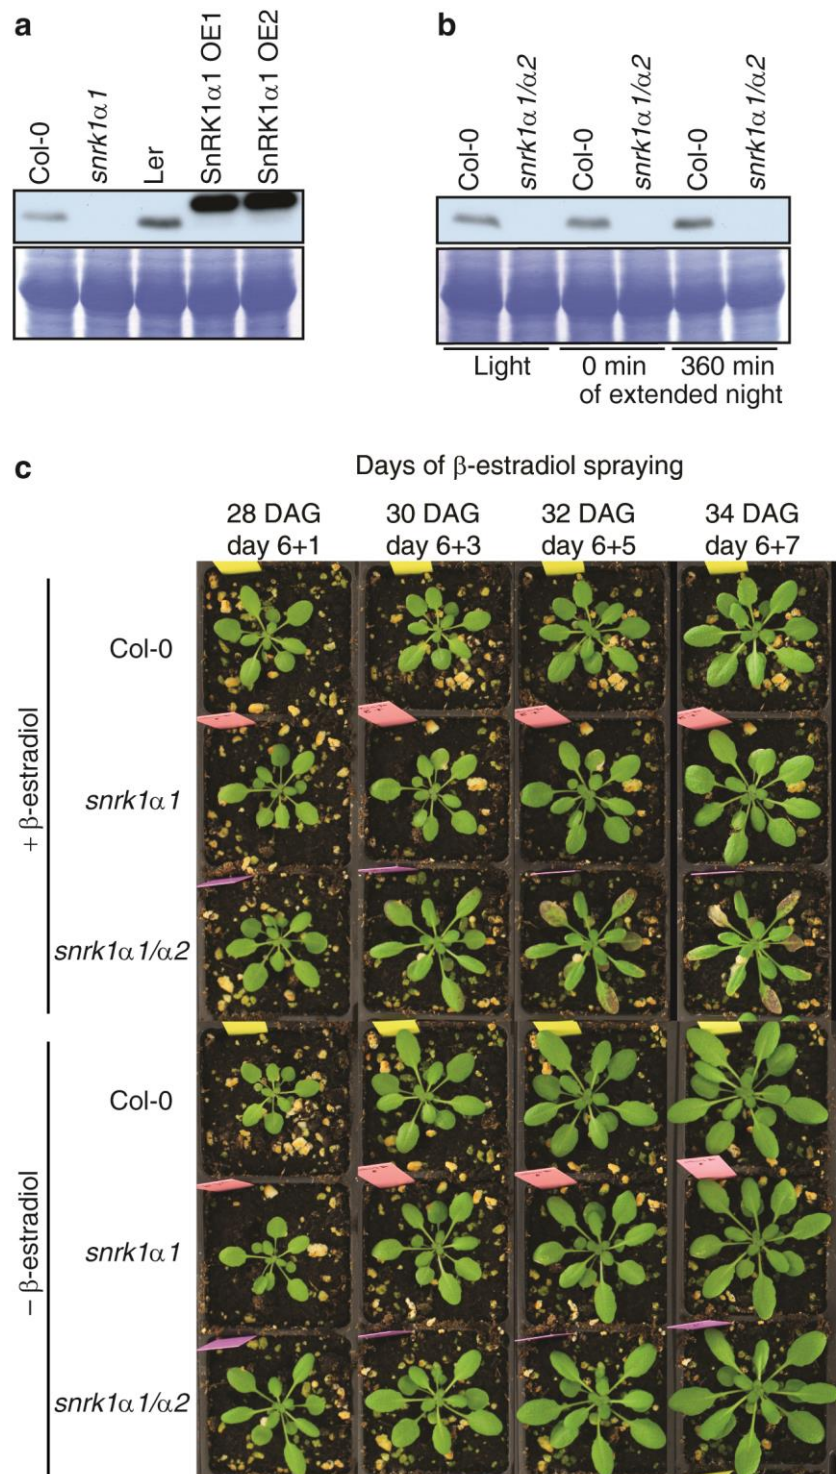

**Supplementary Figure S1.** (a) Abundance of SnRK1α1 in Col-0 wild type, *snrk1α1* ko, Ler wild type, SnRK1 OE1, and SnRK1 OE2. Immunodetection was done with anti-AKIN10 antibody. (b) The expression of SnRK1α1 in Col-0 and *snrk1α1/α2* in the time series experiment for 3 time points (Light, 0 min and 360 min of extended night) is shown with anti-AKIN10 antibody. (c) Phenotype of Col-0 wild type, *snrk1α1* and *snrk1α1/α2* mutants in 12 h/12 h day/night cycle. Knocking down of SnRK1α2 was started after 22 days after germination (DAG). Plants were either sprayed with 10 μM β-estradiol or with same solution without β-estradiol. SnRK1α2 protein is relatively stable and it decreases after 5-6 days after start of β-estradiol treatment (Pedrotti et al. in preparation). The knock down of SnRK1α2 is labelled as day 6 + number of days of knock down.

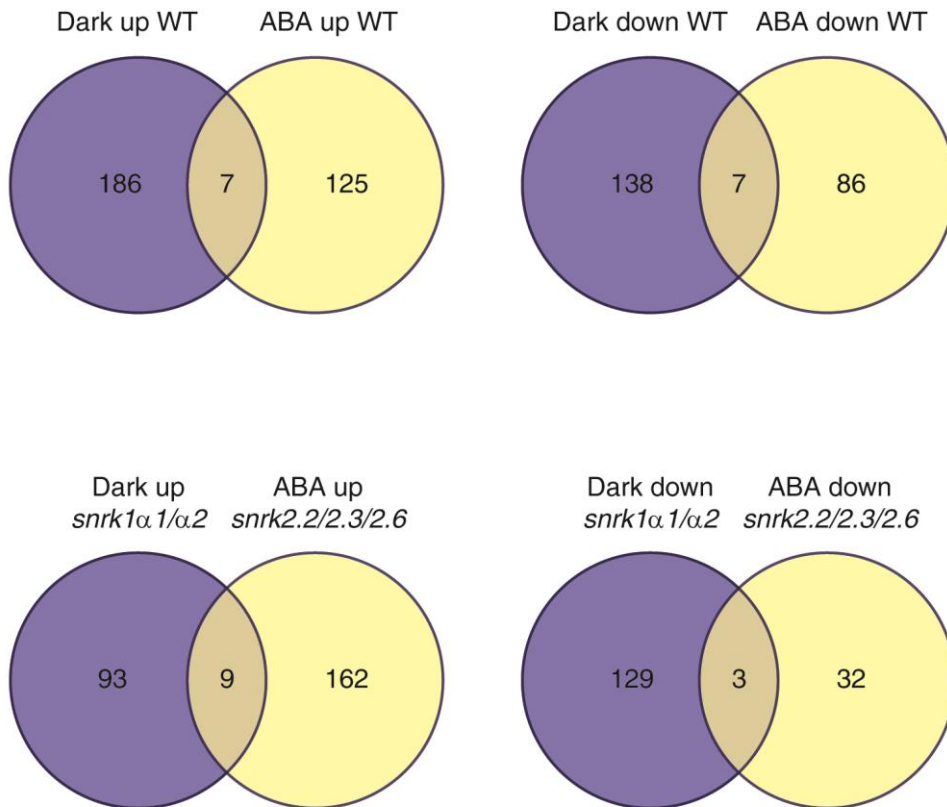

**Supplementary Figure S2.** Comparison of phosphorylated proteins in *snrk1 $\alpha$ 1/ $\alpha$ 2* mutant and *snrk2.2/2.3/2.6* triple mutant (Wang, P. et al. (2013) Quantitative phosphoproteomics identifies SnRK2 protein kinase substrates and reveals the effectors of abscisic acid action. Proc Natl Acad Sci USA 110, 11205-11210). All values of the dark time points were averaged and compared to the averaged light values (fold change >1.5 and <0.67).

a

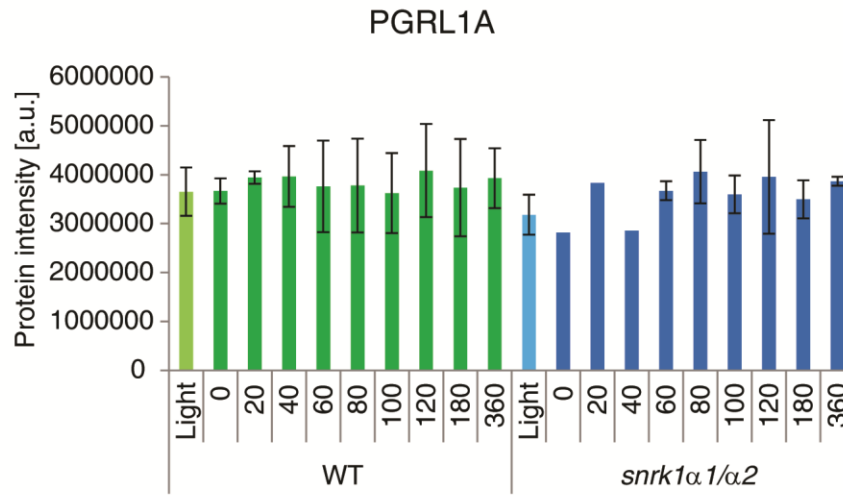

b

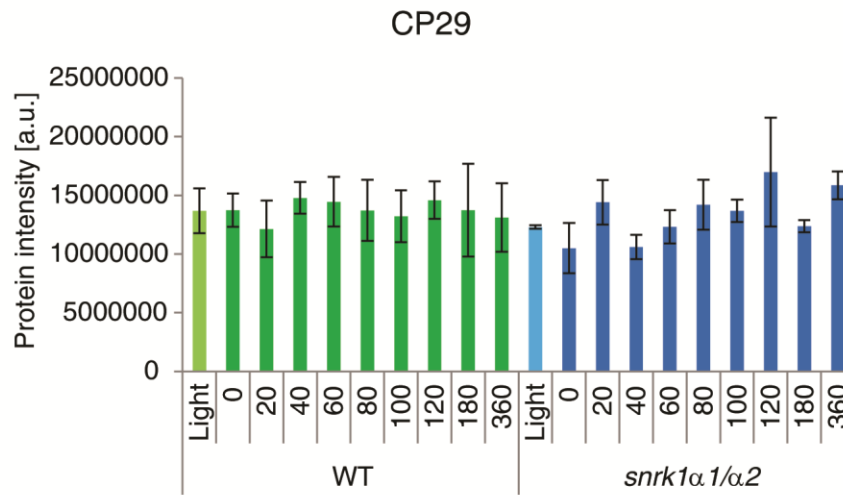

c

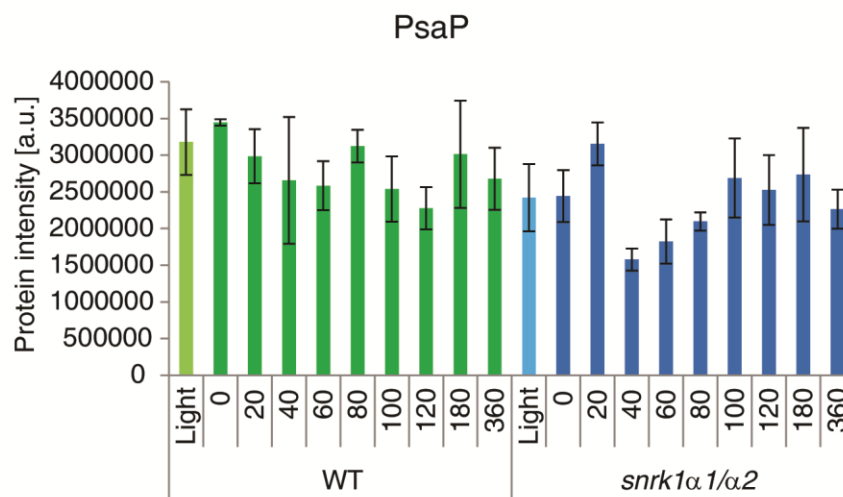

d

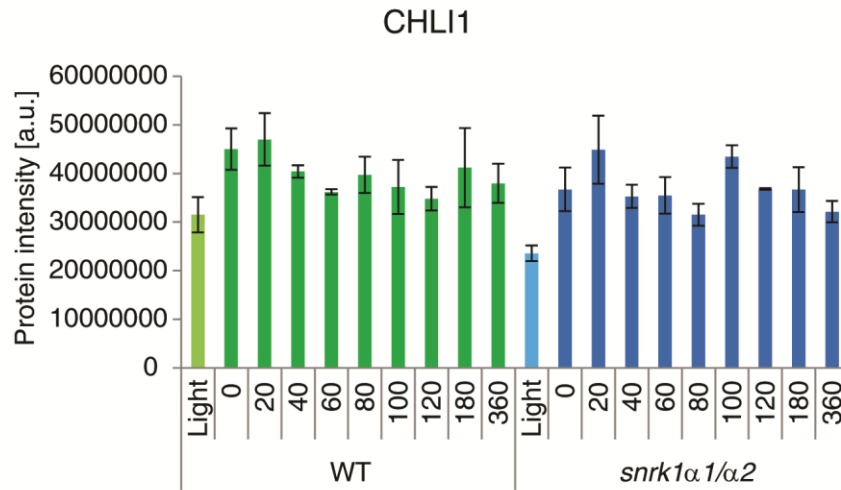

e

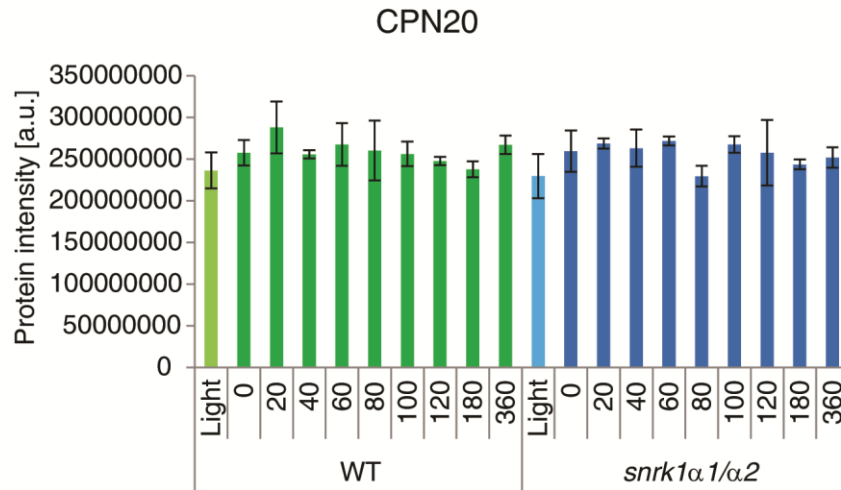

f

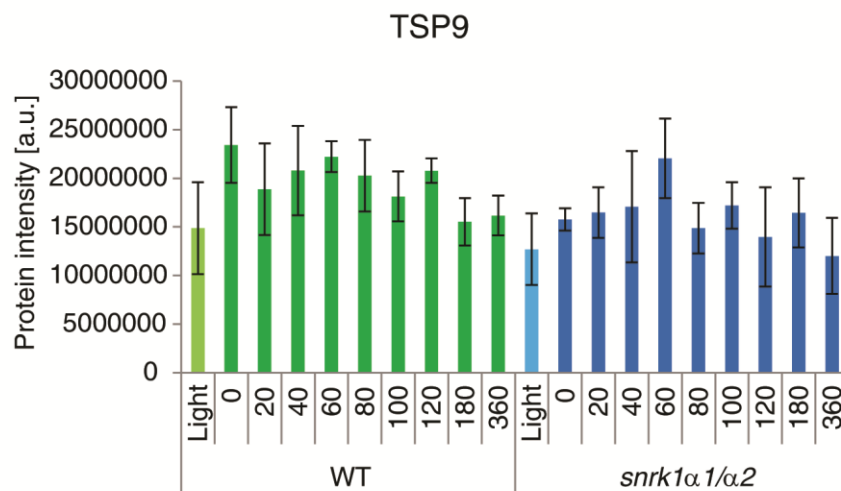

**Supplementary Figure S3.** Total protein abundance of chloroplastic proteins that were differentially phosphorylated in *snrk1α1/α2* mutant and in Col-0 wild type. x-axis represents timepoints (minutes) in extended night.

a

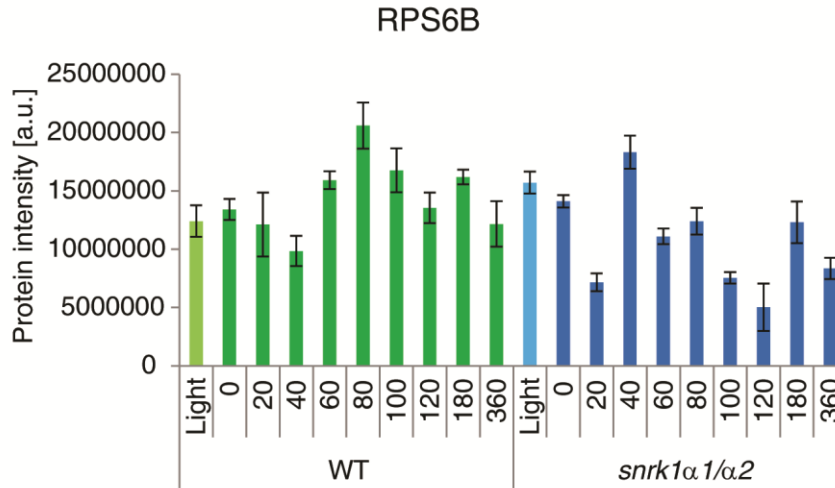

b

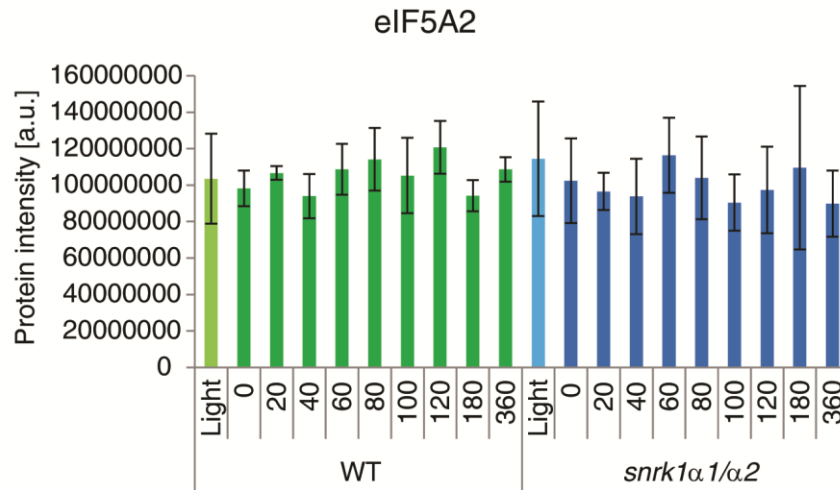

c

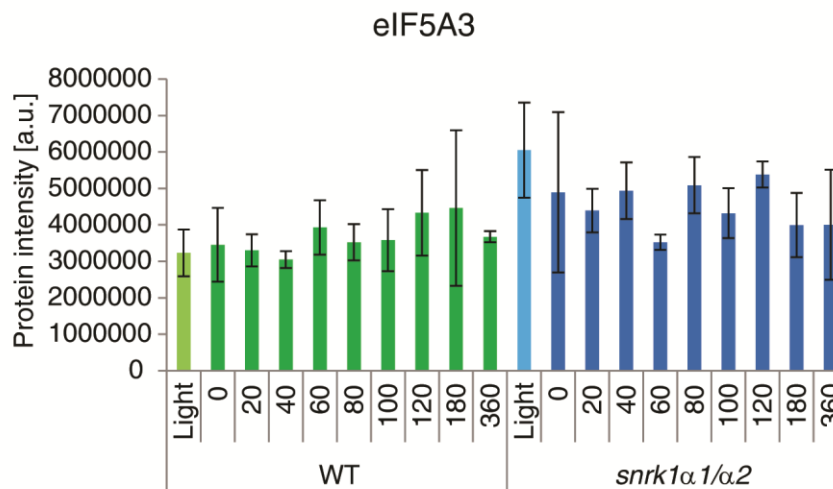

**Supplementary Figure S4.** Total protein abundance of proteins having function in proteins translation that were differentially phosphorylated in *snrk1α.1/α.2* mutant and in Col-0 wild type. x-axis represents timepoints (minutes) in extended night.

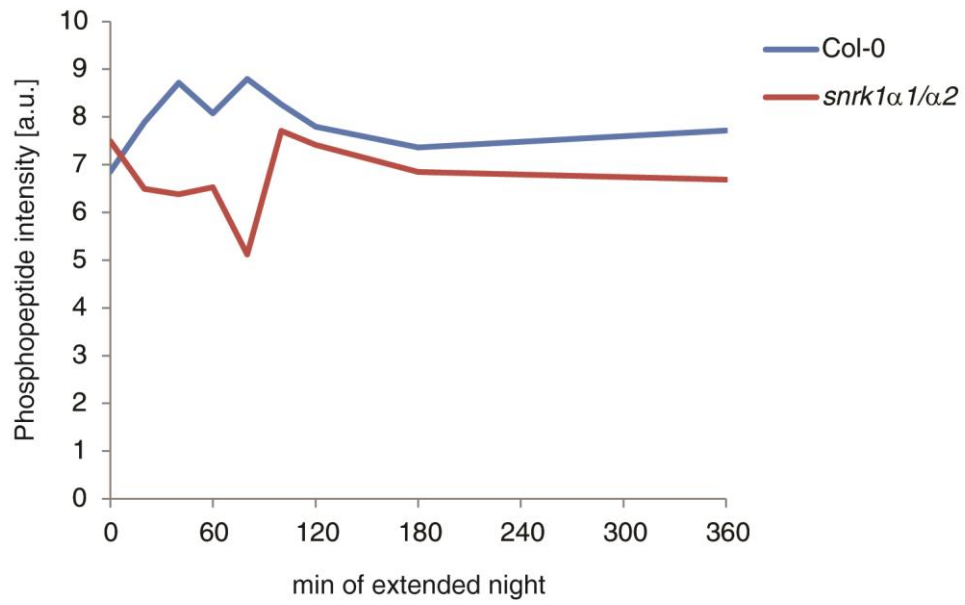

**Supplementary Figure S5.** Abundance of fructose-2,6-bisphosphatase peptide SLS<sup>303</sup>ASSFLIDTK during extended night.

## Supplementary File S1

```

LOCUS      Atraptor\lb\in\p          16714 bp    DNA    circular    13-
OCT-2015
SOURCE
  ORGANISM
COMMENT    This file is created by Vector NTI
           http://www.invitrogen.com/
COMMENT    VNTDATE|747660692|
COMMENT    VNTDBDATE|747661067|
COMMENT    LSOWNER|
COMMENT    VNTNAME|Atraptor lb in pBIN19 YFP (ML747)|
COMMENT    VNTAUTHORNAME|Bernhard Wurzinger|
FEATURES   Location/Qualifiers
  promoter 12119..12535
           /vntifkey="29"
           /label=1x35\Promoter
  enhancer 12544..12674
           /vntifkey="9"
           /label=TL\ (TEV\Leader)
  misc_feature 12525..12567
           /vntifkey="21"
           /label=möglicherweise\kein\XhoI
  terminator 747..950
           /vntifkey="43"
           /label=Terminator\ (CaMV)
  polyA_signal 916..922
           /vntifkey="25"
           /label=Poly(A)\Signal
  misc_feature 7..735
           /vntifkey="21"
           /label=YFP
  misc_feature 730..765
           /vntifkey="21"
           /label=XbaI\nicht\da!!!
  primer_bind complement(70..88)
           /vntifkey="28"
           /label=EGFP-N1-R
  rep_origin complement(7127..7744)
           /standard_name="oriV"
           /vntifkey="33"
           /label=oriV
           /note="shows similarity to GenBank Accession Number
M20134"
  misc_feature complement(6781..7052)
           /vntifkey="21"
           /label=kilA
           /note="shows similarity to kila: GenBank Accession
Number M62846"
  CDS complement(6430..6780)
           /vntifkey="4"
           /label=NPTIII
           /note="shows similarity to NPTIII gene: GenBank
Accession Number V01547"
  transposon complement(5660..6429)
           /vntifkey="44"
           /label=IS1
           /note="shows similarity to transposable element IS1:
GenBank Accession Number X58999"
  misc_feature complement(3185..4666)
           /vntifkey="21"
           /label=trfA

```



```

Number X00713"
    misc_feature      /note="shows similarity to trfA: GenBank Accession
                    complement(2142..3184)
                    /vntifkey="21"
                    /label=tetA
                    /note="shows similarity to tetA: GenBank Accession
Number L13842"
    CDS               complement(1424..1554)
                    /vntifkey="4"
                    /label=lacI
                    /note="shows similarity to lacI: GenBank Accession
Number J01636"
    rep_origin       complement(1123..1423)
                    /standard_name="M13 ori"
                    /vntifkey="33"
                    /label=M13\ori
                    /note="shows similarity to GenBank Accession Number
X02513"
    CDS               complement(11837..11977)
                    /vntifkey="4"
                    /label=lacI
                    /note="shows similarity to lacI: GenBank Accession
Number J01636"
    misc_feature     complement(11395..11836)
                    /vntifkey="21"
                    /label=geneIII
                    /note="shows similarity to geneIII: GenBank
Accession Number V00604"
    repeat_region    complement(10101..10262)
                    /vntifkey="34"
                    /label=RB
                    /note="shows similarity to T-DNA right border:
GenBank Accession Number J01826"
    misc_feature     complement(8905..10088)
                    /vntifkey="21"
                    /label=tetA
                    /note="shows similarity to tetA: GenBank Accession
Number X75761"
    rep_origin       complement(8534..8912)
                    /standard_name="ColE1 ori"
                    /vntifkey="33"
                    /label=ColE1\ori
                    /note="shows similarity to GenBank Accession Number
V00268"
    misc_feature     complement(7757..8540)
                    /vntifkey="21"
                    /label=traF
                    /note="shows similarity to traF: GenBank Accession
Number X54459"
    repeat_unit      complement(1555..1702)
                    /vntifkey="35"
                    /label=LB
    CDS              complement(4667..5659)
                    /vntifkey="4"
                    /label=NPTIII
    primer_bind      complement(12038..12052)
                    /vntifkey="28"
                    /label=M13rev
    primer_bind      complement(974..990)
                    /vntifkey="28"

```

```

        /label=M13fwd
primer_bind 1266..1287
        /vntifkey="28"
        /label=LBa1\primer
primer_bind 1465..1486
        /vntifkey="28"
        /label=LBb1\primer
CDS 10568..11116
        /vntifkey="4"
        /label=Basta-R
misc_feature 12680..16713
        /vntifkey="21"
        /label=Atraptor1b
BASE COUNT      3810 a      4583 c      4305 g      4016 t
ORIGIN
    1 ggccgcatgg tgagcaaggg cgaggagctg ttcaccgggg tggtgcccat
cctggtcgag
   61 ctggacggcg acgtaaacgg ccacaagttc agcgtgtccg gcgagggcga
gggcgatgcc
  121 acctacggca agctgaccct gaagttcatc tgcaccaccg gcaagctgcc
cgtgccctgg
  181 cccaccctcg tgaccacctt cggctacggc ctacagtgct tcgcccgcta
ccccgaccac
  241 atgaagcagc acgacttctt caagtccgcc atgcccgaag gctacgtcca
ggagcgcacc
  301 atctttctca aggacgacgg caactacaag acccgcgccg aggtgaagtt
cgagggcgac
  361 accctgggtg accgcatcga gctgaagggc atcgacttca aggaggacgg
caacatcctg
  421 gggcacaagc tggagtacaa ctacaacagc cacaacgtct atatcatggc
cgacaagcag
  481 aagaacggca tcaaggtgaa cttcaagatc cgccacaaca tcgaggacgg
cagcgtgcag
  541 ctgcccgacc actaccagca gaacaccccc atcggcgacg gccccgtgct
gctgcccgac
  601 aaccactacc tgagctacca gtccgccctg agcaaagacc ccaacgagaa
gcgcgatcac
  661 atggtcctgc tggagttcgt gaccgcccgc gggatcactc tcggcatgga
cgagctgtac
  721 aagagcgggc gctaggctct agagtccgca aaaatcacca gtctctctct
acaaatctat
  781 ctctctctat tttctccaga ataatgtgtg agtagttccc agataagggg
attagggttc
  841 ttatagggtt tcgctcatgt gttgagcata taagaaacct ttagtatgta
tttgtatttg
  901 taaaatactt ctatcaataa aatttcta atcctaaaacc aaaatccagt
gacctactag
  961 tgagctcgaa ttcactggcc gtcgttttac aacgtcgtga ctgggaaaac
cctggcgtaa
 1021 cccaacttaa tcgccttgca gcacatcccc ctttcgccag ctggcgtaat
agcgaagagg
 1081 cccgcaccga tcgcccttcc caacagttgc gcagcctgaa tggcgcccgc
tcctttcgct
 1141 ttcttccctt cctttctcgc cacgttcgcc ggctttcccc gtcaagctct
aaatcggggg
 1201 ctcccttag ggttccgatt tagtgcttta cggcacctcg acccfaaaaa
acttgatttg
 1261 ggtgatgggt cacgtagtgg gccatcgccc tgatagacgg tttttcgccc
tttgacgttg

```

1321 gagtccacgt tctttaatag tggactcttg ttccaaactg gaacaacact  
caaccctatc  
1381 tcgggctatt cttttgattt ataagggatt ttgccgattt cggaaccacc  
atcaaacagg  
1441 attttcgcct gctggggcaa accagcgtgg accgcttgct gcaactctct  
cagggccagg  
1501 cgggtaaggg caatcagctg ttgcccgtct cactgggtgaa aagaaaaacc  
accccagtac  
1561 attaaaaacg tccgcaatgt gttattaagt tgtctaagcg tcaatttgtt  
tacaccacaa  
1621 tatatcctgc caccagccag ccaacagctc cccgaccggc agctcggcac  
aaaatcacca  
1681 ctcgatacag gcagcccatc agtccgggac ggcgtcagcg ggagagccgt  
tgtaaggcgg  
1741 cagactttgc tcatgttacc gatgctattc ggaagaacgg caactaagct  
gccgggtttg  
1801 aaacacggat gatctcgcgg agggtagcat gttgattgta acgatgacag  
agcgttgctg  
1861 cctgtgatca aatatcatct ccctcgcaga gatccgaatt atcagccttc  
ttattcattt  
1921 ctcgcttaac cgtgacaggc tgctgatctt gagaactatg ccgacataat  
aggaaatcgc  
1981 tggataaagc cgctgaggaa gctgagtggc gctatcttct tagaagtgaa  
cgttgacgat  
2041 atcaactccc ctatccattg ctcaccgaat ggtacaggtc ggggaccgca  
agttccgact  
2101 gtcggcctga tgcacccccg gctgatcgac cccagatctg gggctgagaa  
agcccagtaa  
2161 ggaacaact gtaggttcga gtcgcgagat cccccggaac caaaggaagt  
aggttaaacc  
2221 cgctccgatc aggccgagcc acgccaggcc gagaacattg gttcctgtag  
gcatcgggat  
2281 tggcgggatca aactactaaag ctactggaac gagcagaagt cctccggccg  
ccagttgcca  
2341 ggcggtaaaag gtgagcagag gcacgggagg ttgccacttg cgggtcagca  
cggttccgaa  
2401 cgccatggaa accgccccg ccaggcccgc tgcgacgccc acaggatcta  
gcgctgcggt  
2461 tgggtgtcaac accaacagcg ccacgcccgc agttccgcaa atagccccca  
ggaccgcat  
2521 caatcgtatc gggctaccta gcagagcggc agagatgaac acgaccatca  
gcggctgcac  
2581 agcgcctacc gtcgccgca ccccgcccgc caggcggtag accgaaataa  
acaacaagct  
2641 ccagaatagc gaaatattaa gtgcgcccag gatgaagatg cgcattccacc  
agattcccgt  
2701 tggaatctgt cggacgatca tcacgagcaa taaaccgccc ggcaacgccc  
gcagcagcat  
2761 accggcgacc cctcggcctc gctgttcggg ctccacgaaa acgcccgaca  
gatgcgcctt  
2821 gtgagcgtcc ttggggccgt cctcctgttt gaagaccgac agcccaatga  
tctcgcctc  
2881 gatgtaggcg ccgaatgcca cggcatctcg caaccgttca gcgaacgcct  
ccatgggctt  
2941 tttctcctcg tgctcgtaaa cggaccgcaa catctctgga gctttcttca  
gggccgacaa  
3001 tcggatctcg cggaaatcct gcacgtcggc cgctccaagc cgtcgaatct  
gagccttaat  
3061 cacaattgtc aattttaatc ctctgtttat cggcagttcg tagagcgcgc  
cgtgcgtccc

3121 gagcgatact gagcgaagca agtgcgtcga gcagtgcccg cttgttcctg  
aaatgccagt  
3181 aaagcgctgg ctgctgaacc cccagccgga actgacccca caaggccta  
gcgtttgcaa  
3241 tgcaccaggt catcattgac ccaggcgtgt tccaccaggc cgctgcctcg  
caactcttcg  
3301 caggcttcgc cgacctgctc gcgccacttc ttcacgcggg tggaatccga  
tccgcacatg  
3361 aggcggaagg tttccagctt gagcgggtac ggctcccggg gcgagctgaa  
atagtcgaac  
3421 atccgctcggg ccgctcggcga cagcttgccg tacttctccc atatgaattt  
cgtgtagtgg  
3481 tcgccagcaa acagcacgac gatttcctcg tcgatcagga cctggcaacg  
ggacgttttc  
3541 ttgccacggg ccaggacgcg gaagcgggtgc agcagcgaca ccgattccag  
gtgcccaacg  
3601 cggctcggacg tgaagcccat cgccgctgcc tgtaggcgcg acaggcattc  
ctcggccttc  
3661 gtgtaatacc ggccattgat cgaccagccc aggtcctggc aaagctcgta  
gaacgtgaag  
3721 gtgatcggct cgccgatagg ggtgcgcttc gcgtactcca acacctgctg  
ccacaccagt  
3781 tcgtcatcgt cggcccgcag ctcgacgccg gtgtaggtga tcttcacgtc  
cttgttgacg  
3841 tggaaaatga ccttgttttg cagcgcctcg cgcgggattt tcttgttgcg  
cgtggtgaac  
3901 agggcagagc gggccgtgtc gtttggcatc gctcgcacg tgtccggcca  
cggcgcaata  
3961 tcgaacaagg aaagctgcat ttccttgatc tgctgcttcg tgtgtttcag  
caacgcggcc  
4021 tgcttgccct cgctgacctg ttttgccagg tcctcgcggg cggtttttcg  
cttcttggtc  
4081 gtcatagttc ctgcgctgtc gatggctatc gacttcgcca aacctgccgc  
ctcctgttcg  
4141 agacgacgcg aacgctccac ggcggccgat ggcgcgggca gggcaggggg  
agccagtgc  
4201 acgctgtcgc gctcgatctt ggccgtagct tgctggacca tcgagccgac  
ggactggaag  
4261 gtttcgcggg gcgcacgcat gacgggtgcg cttgcgatgg tttcggcatc  
ctcggcgga  
4321 aacccgcgct cgatcagttc ttgcctgtat gccttcggg caaacgtccg  
attcattcac  
4381 cctccttgcg ggattgcccc gactcacgcc ggggcaatgt gcccttattc  
ctgatttgac  
4441 ccgcctggtg ccttggtgtc cagataatcc accttatcgg caatgaagtc  
ggctcccgtg  
4501 accgtctggc cgtccttctc gtacttggtg ttccgaatct tgccctgcac  
gaataccagc  
4561 gacccttgc ccaataactt gccgtgggccc tcggcctgag agccaaaaca  
cttgatgcgg  
4621 aagaagtcgg tgcgctcctg cttgtcggcg gcatcgttgc gccacatcta  
ggactactaaa  
4681 caattcatcc agtaaaatat aatattttat tttctcccaa tcaggcttga  
tccccagtaa  
4741 gtcaaaaaat agctcgacat actgttcttc cccgatatcc tcctgatcg  
accggacgca  
4801 gaaggcaatg tcataccact tgtccgcctt gccgcttctc ccaagatcaa  
taaagccact  
4861 tactttgcca tctttcacia agatgttgct gtctcccagg tcgccgtggg  
aaaagacaag

4921 ttctcttctg ggcttttccg tctttaaaaa atcatcacagc tcgcgcggat  
ctttaaattgg  
4981 agtgtcttct tcccagtttt cgcaatccac atcggccaga tcgttattca  
gtaagtaatc  
5041 caattcggct aagcggctgt ctaagctatt cgtatagggga caatccgata  
tgtcgatgga  
5101 gtgaaagagc ctgatgcact ccgcatacag ctcgataatc ttttcagggc  
tttgttcatc  
5161 ttcataactct tccgagcaaa ggacgccatc ggcctcactc atgagcagat  
tgctccagcc  
5221 atcatgccgt tcaaagtgca ggacctttgg aacaggcagc tttccttcca  
gccatagcat  
5281 catgtccttt tcccgttcca catcataggt ggtcccttta taccggctgt  
ccgtcatttt  
5341 taaatatagg ttttcatttt ctcccaccag cttatatacc ttagcaggag  
acattccttc  
5401 cgtatctttt acgcagcggg atttttcgat cagttttttc aattccgggtg  
atattctcat  
5461 tttagccatt tattatttcc ttctctttt ctacagtatt taaagatacc  
ccaagaagct  
5521 aattataaca agacgaactc caattcactg ttccttgcat tctaaaacct  
taaataccag  
5581 aaaacagctt tttcaaagtt gttttcaaag ttggcgtata acatagtatc  
gacggagccg  
5641 attttgaaac cacaattatg ggtgatgctg ccaacttact gatttagtgt  
atgatgggtg  
5701 ttttgagggtg ctccagtggc ttctgtgtct atcagctgtc cctcctgttc  
agctactgac  
5761 ggggtggtgc gtaacggcaa aagcaccgcc ggacatcagc gctatctctg  
ctctcactgc  
5821 cgtaaaacat ggcaactgca gttcacttac accgcttctc aaccgggtac  
gcaccagaaa  
5881 atcattgata tggccatgaa tggcgttga tgccgggcaa cagcccgcac  
tatgggcggt  
5941 ggcctcaaca cgattttacg tcaacttaaaa aactcaggcc gcagtcggta  
acctcgcgca  
6001 tacagccggg cagtgcgctc atcgtctgcy cggaaatgga cgaacagtgg  
ggctatgtcg  
6061 gggctaaatc gcgccagcgc tggctgtttt acgcgtatga cagtctccgg  
aagacgggtg  
6121 ttgcgcacgt attcggtgaa cgcactatgg cgacgctggg gcgtcttatg  
agcctgctgt  
6181 caccctttga cgtggtgata tggatgacgg atggctggcc gctgatgaa  
tcccgcctga  
6241 agggaaagct gcacgtaatc agcaagcgc atacgcagcg aattgagcgg  
cataacctga  
6301 atctgaggca gcacctggca cggctgggac ggaagtcgct gtcgttctca  
aaatcgggtg  
6361 agctgcatga caaagtcacg gggcattatc tgaacataaa aactatcaa  
taagttggag  
6421 tcattacca attatgatag aatttacaag ctataagggt attgtcctgg  
gtttcaagca  
6481 ttagtccatg caagttttta tgctttgccc attctataga tatattgata  
agcgcgctgc  
6541 ctatgccttg ccccctgaaa tccctacata cggcgatatc ttctatataa  
aagatatatt  
6601 atcttatcag tattgtcaat atattcaagg caatctgcct cctcatcctc  
ttcatcctct  
6661 tcgtcttggg agctttttta atatggcgct tcatagagta attctgtaaa  
ggccaattc

6721 tcgttttcat acctcggtat aatcttacct atcacctcaa atggttcgct  
gggtttatcg  
6781 ccccccgaa cacgagcacg gcacccgcga ccactatgcc aagaatgccc  
aaggtaaaaa  
6841 ttgccggccc cgccatgaag tccgtgaatg ccccgacggc cgaagtgaag  
ggcaggccgc  
6901 caccagggcc gccgccctca ctgcccggca cctggtcgct gaatgtcgat  
gccagcacct  
6961 gcggcacgtc aatgcttccg ggcgtcgcgc tcgggctgat cgccatccc  
gttactgccc  
7021 cgatcccggc aatggcaagg actgccagcg ctgccatddd tggggtgagg  
ccgttcgcgg  
7081 ccgagggggcg cagcccctgg ggggatggga ggcccgcgct agcgggcccg  
gagggttcga  
7141 gaaggggggg cccccctt cggcgtgcgc ggtcacgcgc acagggcgca  
gccctggtta  
7201 aaaacaaggt ttataaatat tggtttaaaa gcaggttaaa agacaggtta  
gcggtggccg  
7261 aaaaacgggc ggaaaccctt gcaaatgctg gatdddctgc ctgtggacag  
cccctcaaat  
7321 gtcaataggt gcgccctca tctgtcagca ctctgcccct caagtgtcaa  
ggatcgcgcc  
7381 cctcatctgt cagtagtcgc gcccctcaag tgtcaatacc gcagggcact  
tatccccagg  
7441 cttgtccaca tcatctgtgg gaaactcgcg taaaatcagg cgtdtccgc  
gatttgcgag  
7501 gctggccagc tccacgtcgc cggccgaaat cgagcctgcc cctcatctgt  
caacgccgcg  
7561 ccgggtgagt cggcccctca agtgtcaacg tccgcccctc atctgtcagt  
gagggccaag  
7621 ttttcgcgga ggtatccaca acgcccggcg gcgcggtgtc tcgcacacgg  
cttcgacggc  
7681 gtdtctggcg cgtttgcagg gccatagacg gccgccagcc cagcggcgag  
ggcaaccagc  
7741 ccggtgagcg tcgcaaaggc gctcggctct gccttgctcg tcggtgatgt  
acttcaccag  
7801 ctccgcgaag tcgctcttct tgatggagcg catggggacg tgcttgcaa  
tcacgcgcac  
7861 cccccggccg ttttagcggc taaaaaagtc atggctctgc cctcgggccc  
accacgccc  
7921 tcatgacctt gccaagctcg tctgtcttct cttcgatctt cgccagcagg  
gcgaggatcg  
7981 tggcatcacc gaaccgcgcc gtgcgcgggt cgtcgggtgag ccagagtttc  
agcaggccgc  
8041 ccaggcggcc caggtcgcca ttgatgcggg ccagctcgcg gacgtgctca  
tagtccacga  
8101 cgcccgtgat tttgtagccc tggccgacgg ccagcaggta ggccgacagg  
ctcatgccgg  
8161 ccgccgccgc ctttctca atcgtcttct gttcgtctgg aaggcagtac  
accttgatag  
8221 gtgggctgcc cttcctggtt ggcttggttt catcagccat ccgcttgccc  
tcatctgta  
8281 cgccggcggt agccggccag cctcgcagag caggattccc gttgagcacc  
gccaggtgcg  
8341 aataaggac agtgaagaag gaacaccgc tcgcccgggtg gcctacttca  
cctatcctgc  
8401 ccggctgacg ccggttgata caccaaggaa agtctacacg aacccttg  
caaatcctg  
8461 tatatcgtgc gaaaaggat ggatataccg aaaaaatcgc tataatgacc  
ccgaagcagg

8521 gttatgcagc ggaaaagcgc cacgcttccc gaagggagaa aggcggacag  
gtatccggta  
8581 agcggcaggg tcggaacagg agagcgcacg agggagcttc cagggggaaa  
cgcctggtat  
8641 ctttatagtc ctgtcggggt tcgccacctc tgacttgagc gtcgattttt  
gtgatgctcg  
8701 tcaggggggc ggagcctatg gaaaaacgcc agcaacgcgg cctttttacg  
gttcctggcc  
8761 ttttgctggc cttttgctca catgttcttt cctgcgttat ccctgattc  
tgtggataac  
8821 cgtattaccg cctttgagtg agctgatacc gctcgcgcga gccgaacgac  
cgagcgcagc  
8881 gagtcagtga gcgaggaagc ggaagagcgc cagaaggccg ccagagaggc  
cgagcgcggc  
8941 cgtgaggctt ggacgctagg gcagggcatg aaaaagcccg tagcgggctg  
ctacgggctg  
9001 ctgacgcggt ggaaaggggg aggggatggt gtctacatgg ctctgctgta  
gtgagtgggt  
9061 tgcgctccgg cagcggtcct gatcaatcgt caccctttct cggtccttca  
acgttcctga  
9121 caacgagcct cttttcgcc aatccatcga caatcaccgc gagtccctgc  
tcgaacgctg  
9181 cgtccggacc ggcttcgctg aaggcgtcta tcgcgggccc caacagcggc  
gagagcggag  
9241 cctgttcaac ggtgccgccc cgctcgcggc catcgcctgc gccggcctgc  
tcctcaagca  
9301 cggccccaac agtgaagtag ctgattgtca tcagcgcatt gacggcgtcc  
ccggcccga  
9361 aaccgcctc gcagaggaag cgaagctgcg cgtcggccgt ttccatctgc  
gggtgcgccc  
9421 gtcgcgtgcc ggcatggatg cgcgcgccat cgcggtaggc gagcagcgc  
tgctgaagc  
9481 tgcgggcatt cccgatcaga aatgagcgc agtcgctcgc ggctctcggc  
accgaatgcg  
9541 tatgattctc cgccagcatg gcttcggcca gtgcgctcgc cagcgcgcc  
ttgttcctga  
9601 agtgccagta aagcgcggc tgctgaacc ccaaccgttc cgccagtttg  
cgtgtcgtca  
9661 gaccgtctac gccgacctc ttcaacaggt ccagggcggc acggatcact  
gtattcggct  
9721 gcaactttgt catgcttgac actttatcac tgataaacat aatatgtcca  
ccaacttatc  
9781 agtgataaag aatccgcgcg ttcaatcgga ccagcggagg ctggtccgga  
ggccagacgt  
9841 gaaacccaac ataccctga tcgtaattct gagcactgtc gcgctcgcg  
ctgtcggcat  
9901 cggcctgatt atgccggtgc tgccgggcct cctgcgcgat ctggttact  
cgaacgacgt  
9961 caccgcccac tatggcattc tgctggcgct gtatgcgttg gtgcaatttg  
cctgcgcacc  
10021 tgtgctgggc gcgctgtcgg atcgtttcgg gcggcggcca atcttgctcg  
tctcgtggc  
10081 cggcgcgaga tctggggaac cctgtggttg gcatgcacat acaaatggac  
gaacggataa  
10141 accttttcac gcccttttaa atatccgatt attctaataa acgctctttt  
ctcttaggtt  
10201 taccgcgcaa tatacctgt caaacactga tagtttaaac tgaaggcggg  
aaacgacaat  
10261 ctgatcatga gcggagaatt aaggagtcg cgttatgacc cccgcccgatg  
acgcgggaca

10321 agccgtttta cgtttgaac tgacagaacc gcaacggtga aggagccact  
cagccgcggg  
10381 tttctggagt ttaatgagct aagcacatac gtcagaaacc attattgcbc  
gttcaaaagt  
10441 cgcctaaggt cactatcagc tagcaaatat ttcttgtcaa aatgctcca  
ctgacgttcc  
10501 ataaattccc ctcggtatcc aattagagtc tcatattcac tctcaactcg  
atcgaggggg  
10561 atctaccatg agcccagaac gacgcccggc cgacatccgc cgtgccaccg  
aggcggacat  
10621 gccggcggtc tgcaccatcg tcaaccacta catccagaca agcacggtca  
acttccgtac  
10681 cgagccgcag gaaccgcagg agtggacgga cgacctcgtc cgtctgcggg  
agcgctatcc  
10741 ctggctcgtc gccgaggtgg acggcgaggt cgccggcatc gcctacgcgg  
gtccctggaa  
10801 ggcacgcaac gcctacgact ggacggccga gtcgaccgtg tacgtctccc  
cccgccacca  
10861 gcggacggga ctgggctcca cgctctacac ccacctgctg aagtcctgg  
aggcacaggg  
10921 cttcaagagc gtggctcgtg tcatcgggct gcccaacgac ccgagcgtgc  
gcatgcacga  
10981 ggcgctcggg tatgcccc gggcatgct gcgggcggcc ggcttcaagc  
acgggaactg  
11041 gcatgacgtg ggtttctggc agctggactt cagcctgccg gtgccgcccc  
gtccggctct  
11101 gcccgtcacc gaaatctgat gaccctaga gtcaagcaga tcgttcaaac  
atctggcaat  
11161 aaagtttctt aagattgaat cctggtgccg gtcttgccat gattatcata  
taatttctgt  
11221 tgaattacgt taagcatgta ataattaaca tgtaatgcat gacgttattt  
atgagatggg  
11281 tttttatgat tagagtcccg caattataca ttttaatacgc gatagaaaac  
aaaatatagc  
11341 gcgcaaaacta ggataaatta tcgcgcgcgg tgtcatctat gttactagat  
cgggcctcct  
11401 gtcaatgctg gcggcggtc tgggtgggt tctggtggcg gctctgaggg  
tgggtgctct  
11461 gaggggtggcg gttctgaggg tggcggtctt gagggagggc gttccgggtg  
tggctctggg  
11521 tccggtgatt ttgattatga aaagatggca aacgctaata aggggctat  
gaccgaaaat  
11581 gccgatgaaa acgcgctaca gtctgacgct aaaggcaaac ttgattctgt  
cgctactgat  
11641 tacgggtcgt ctatcgatgg tttcattggt gacgtttccg gccttgctaa  
tggtaatggt  
11701 gctactggtg attttgctgg ctctaattcc caaatggctc aagtcggtga  
cggtgataat  
11761 tcacctttaa tgaataattt ccgtcaatat ttaccttccc tcctcaatc  
ggttgaatgt  
11821 cggccttttg tctttggccc aatacgcaaa ccgcctctcc ccgcgcggtg  
gccgattcat  
11881 taatgcagct ggcacgacag gtttcccgc tggaaagcgg gcagtgcg  
caacgcaatt  
11941 aatgtgagtt agctcactca ttaggcacc caggctttac actttatgct  
tccggctcgt  
12001 atgttgtgtg gaattgtgag cggataaaca tttcacacag gaaacagcta  
tgaccatgat  
12061 tacgccaagc ttgcatgcct gcaggtcgac tctagaggat ccccggtac  
cgtccgtcaa



12121 catggtggag cacgacacac ttgtctactc caaaaatatc aaagatacag  
tctcagaaga  
12181 ccaaagggca attgagactt ttcaacaaag ggtaatatcc ggaacctcc  
tcggattcca  
12241 ttgccagct atctgtcact ttattgtgaa gatagtggaa aaggaaggtg  
gctcctacaa  
12301 atgccatcat tgcgataaag gaaaggccat cgttgaagat gcctctgccg  
acagtgggtcc  
12361 caaagatgga cccccacca cgaggagcat cgtggaaaaa gaagacgttc  
caaccacgtc  
12421 ttcaaagcaa gtggattgat gtgatatctc cactgacgta agggatgacg  
cacaatccca  
12481 ctatccttcg caagaccctt cctctatata aggaagttca tttcatttgg  
agaggacctc  
12541 gacctcaaca caacatatac aaaacaaacg aatctcaagc aatcaagcat  
tctacttcta  
12601 ttgcagcaat ttaaactcatt tcttttaaag caaaagcaat tttctgaaaa  
ttttcaccat  
12661 ttacgaacga tagccgggga tggcattagg agacttaatg gtgtctcggg  
tctcgcaatc  
12721 ttctgtttct ttggctcca atcaccgta cgacgaagac tgtgtctcta  
gtcacgatga  
12781 cgggtgattcc cggaggaagg attctgaggc taagagcagt agtagctacg  
ggaatgggtac  
12841 aacggagggga gccgccaccg ccaccagcat ggcttacttg cctcagacta  
ttgtgctctg  
12901 cgagcttaga cacgacgcat ccgaggcttc tgctcccttg gggacttctg  
agatcgtatt  
12961 ggtccccaaa tggcggctta aagaacgaat gaaaacagga tgtgtagctt  
tagttctgtg  
13021 tttaaacatt actgttgatc cgccggatgt tataaagata tctccttgtg  
ctagaatcga  
13081 ggcattggata gatccatttt ctatggcacc gcctaaagct ctcgagacaa  
ttggaaaaaaa  
13141 tttgagcact cagtatgaga gatggcaacc cagggcccgcc tataaggttc  
agcttgatcc  
13201 gacagtagat gaggtgagga agctgtgctt gacttgtcgg aaatatgcaa  
agaccgagag  
13261 agttctattc cattataatg ggcattgggt gccaaaacct acagctaatg  
gtgaaatttg  
13321 ggtatttaac aagagttata cacagtacat tcccttgcca atcagtgaac  
ttgattcctg  
13381 gttgaagaca ccctccatct atgttttcga ctgctctgct gctaggatga  
ttctgaatgc  
13441 ctttgctgag cttcatgatt ggggttcttc tggttcctct ggatcctcaa  
gggactgcat  
13501 tctacttgct gcttgtgatg tacatgagac acttcctcag agcgttgagt  
ttccagctga  
13561 tgtttttacg tcttgctga caacgcccat taaaatggcg ttgaaatggg  
tctgcaggcg  
13621 ttcgcttctg aaagaaatta tcgatgaatc acttatcgac aggattccag  
gccggcaaaa  
13681 cgatcgtaag acattgttag gggagttgaa ctggattttc acagcagtga  
cggatacaat  
13741 tgcttggaat gtgcttcctc atgaactttt ccagagatta ttcagacagg  
acttgttggg  
13801 cgctagcctt ttccggaatt tcttacttgc tgagagaata atgcgggtccg  
caactgtaa  
13861 tccaatatct caccctatgc tgccctctac gcatcaacat catatgtggg  
atgcatggga

13921 catggctgct gaaatctgtc tttctcagct tccccaactt gttctggacc  
caagcacaga  
13981 gttccagcca agtccgtttt ttactgagca actgacagct tttgaggtgt  
ggcttgatca  
14041 tggatctgag cataagaagc caccggagca gttacctatt gttcttcagg  
tgttacttag  
14101 ccagtgccat cggtttcgtg ctcttgact tcttggaga tttcttgata  
tgggttcag  
14161 ggctgtggat ctggccttgt ctggttgaat attcccatat gtgctgaagc  
ttctgcaaac  
14221 aacaacgaat gagctaagac agatcctggt tttcatatgg acaaaaattc  
ttgcacttga  
14281 caagtcatgt caaattgatc ttgtgaagga tggggggcat acatacttca  
tacgatttct  
14341 agatagctcg ggtgcatttc cagaacaacg agctatggct gcttttgttc  
tggctgtcat  
14401 tgtggatgga catcgacgag gccaggaagc atgtcttgaa gctaatttaa  
ttgggtgtttg  
14461 tctcgggac cttgaagcat ccagaccaag tgatccacaa ccagaacat  
tgtttctaca  
14521 atggccttgt ctttgccttg gaaagttatg ggaagatfff atggaggccc  
aaataatggg  
14581 cagggaggca aatgcctttg aaaagttggc acctctgctt tccgagcccc  
aacctgaggt  
14641 aagggctgct gcagtttttg ccctgggtac cttgcttgat attgggtttg  
actctaataa  
14701 aagtgtggtg gaggatgaat ttgatgatga tgaaaagatt agagccgaag  
acgctatcat  
14761 taaaagtctc ttagatgtag tttcagatgg gagtccactt gtccgagcag  
aggttgccgt  
14821 agctcttgca cgttttgctt ttggccacaa acagcacctt aagttagccg  
cagcttcata  
14881 ttggaagcct cagtcaagtt ctttgcttac ttctctacct tcaatagcta  
aattccatga  
14941 tcctgggagt gcaacaattg tttctttaca catgagtcct ctgactagag  
ctagcacgga  
15001 tagccaacca gtggctcgtg agtctaggat ctcaagcagc cctcttggtc  
cctctgggct  
15061 gatgcaagga tctccattat ctgatgattc ttcgttacat tctgattctg  
gaatgatgca  
15121 tgacagtgtc agcaatggag cgggccatca gccaaagactg ttggataatg  
ctgtttattc  
15181 gcagtgcgtc cgagctatgt ttgcattagc taaagatcca tctccacgta  
ttgcaagtct  
15241 cggacggcgt gtgctttcta ttattggaat cgaacagggt gttgcgaaac  
cctcgaagcc  
15301 cactggccga ccaggggaag ctgcaacgac atctcacact ccacttgctg  
gcctagctcg  
15361 ttcacctca tggtttgata tgcattgagc taatctgcct ttaagtttta  
ggactcccc  
15421 ggtcagcccc cctagaacaa actacctgag tggattgagg agagtttgtt  
cattagagtt  
15481 caggcctcat ctattgggtt caccgactc aggattggct gatccgcttt  
taggcgcccag  
15541 tggatctgaa cggagtttgc ttccactatc aactatctac ggctggagtt  
gtgggcactt  
15601 ttctaagcca cttcttgggtg gtgcggatgc tagtcaagag attgcagcca  
aaagagaaga  
15661 gaaagaaaaa ttcgcacttg agcatattgc aaaatgccag cactcttcta  
ttagcaagct

15721 caacaataat cctattgcca actgggatac aaggtttgaa acgggaacaa  
agacagccct  
15781 ccttcaccca ttctctccta ttgtagtgc tgcagacgag aatgaacgga  
tcagagtgtg  
15841 gaactatgag gaagcaactc ttctcaatgg ctttgacaat catgattttc  
ctgacaaagg  
15901 aatttcaaag ctctgcctca tcaatgaact tgacgactct ctgctacttg  
ttgcatcatg  
15961 cgatgggtcg gtccggatat ggaaaaacta tgcaactaag ggtaaacaaa  
agcttggttac  
16021 tgggttttct tcaatccagg gtcacaagcc cggtgcccgt gacttgaacg  
ctgtcgtgga  
16081 ctggcaacaa cagtccggtt acctgtatgc ttctggggag acgtcaacag  
tcacactttg  
16141 ggacctggag aaagaacagc ttgtcagatc tgttccctct gaatcagaat  
gtggagtac  
16201 agcactttct gcttctcaag tgcacggagg ccaactcgtc gctggtttg  
ctgatggatc  
16261 tttgagactc tatgatgttc ggtcacctga accgcttgtc tgcgcgactc  
ggcctcatca  
16321 gaaagttgaa agggtggttg gcctcagttt tcaacctgga cttgaccccg  
caaaggtggg  
16381 gagtgcacaa caggcgggtg acatacagtt tcttgacctt agaacaacaa  
gggacacata  
16441 cctgacgatt gatgcacaca ggggttact cacggcetta gctgttcaca  
gacacgctcc  
16501 aataatcgcg agtggatctg caaacacagct cattaagta ttcagtcttc  
aaggggaaca  
16561 actagggata atccgctact acccatcctt catggetcaa aagattggat  
cagtgagttg  
16621 cctcacattt catccgtacc aggttctgct agcagctgga gctgctgact  
catttgtctc  
16681 catatacacc cacgacaact cgcaagcaag atgc

//

## Supplementary File S2

```

LOCUS      pBIN19\AKIN10\mC          14196 bp    DNA    circular    11-
FEB-2015
SOURCE
  ORGANISM
COMMENT    This file is created by Vector NTI
           http://www.invitrogen.com/
COMMENT    VNTDATE|725363803|
COMMENT    VNTDBDATE|725363803|
COMMENT    LSOWNER|
COMMENT    VNTNAME|pBIN19 AKIN10 mCherry (355)|
COMMENT    VNTAUTHORNAME|lala|
FEATURES   Location/Qualifiers
  rep_origin    complement(7107..7724)
                /standard_name="oriV"
                /vntifkey="33"
                /label=oriV
                /note="shows similarity to GenBank Accession Number
M20134"
  misc_feature  complement(6761..7032)
                /vntifkey="21"
                /label=kilA
                /note="shows similarity to kilA: GenBank Accession
Number M62846"
  CDS           complement(6410..6760)
                /vntifkey="4"
                /label=NPTIII
                /note="shows similarity to NPTIII gene: GenBank
Accession Number V01547"
  transposon    complement(5640..6409)
                /vntifkey="44"
                /label=IS1
                /note="shows similarity to transposable element IS1:
GenBank Accession Number X58999"
  misc_feature  complement(3165..4646)
                /vntifkey="21"
                /label=trfA
                /note="shows similarity to trfA: GenBank Accession
Number X00713"
  misc_feature  complement(2122..3164)
                /vntifkey="21"
                /label=tetA
                /note="shows similarity to tetA: GenBank Accession
Number L13842"
  CDS           complement(1404..1534)
                /vntifkey="4"
                /label=lacI
                /note="shows similarity to lacI: GenBank Accession
Number J01636"
  rep_origin    complement(1103..1403)
                /standard_name="M13 ori"
                /vntifkey="33"
                /label=M13\ori
                /note="shows similarity to GenBank Accession Number
X02513"
  CDS           complement(11817..11957)
                /vntifkey="4"
                /label=lacI
                /note="shows similarity to lacI: GenBank Accession
Number J01636"
  misc_feature  complement(11375..11816)

```

```

/vntifkey="21"
/label=geneIII
/note="shows similarity to geneIII: GenBank
Accession Number V00604"
  repeat_region complement(10081..10242)
                /vntifkey="34"
                /label=RB
                /note="shows similarity to T-DNA right border:
GenBank Accession Number J01826"
  misc_feature complement(8885..10068)
               /vntifkey="21"
               /label=tetA
               /note="shows similarity to tetA: GenBank Accession
Number X75761"
  rep_origin complement(8514..8892)
             /standard_name="ColE1 ori"
             /vntifkey="33"
             /label=ColE1\ori
             /note="shows similarity to GenBank Accession Number
V00268"
  misc_feature complement(7737..8520)
               /vntifkey="21"
               /label=traF
               /note="shows similarity to traF: GenBank Accession
Number X54459"
  repeat_unit complement(1535..1682)
              /vntifkey="35"
              /label=LB
  CDS complement(4647..5639)
      /vntifkey="4"
      /label=NPTIII
  primer_bind complement(12018..12032)
              /vntifkey="28"
              /label=M13rev
  primer_bind complement(954..970)
              /vntifkey="28"
              /label=M13fwd
  primer_bind 1246..1267
              /vntifkey="28"
              /label=LBA1\primer
  primer_bind 1445..1466
              /vntifkey="28"
              /label=LBB1\primer
  CDS 10548..11096
      /vntifkey="4"
      /label=Basta-R
  misc_feature 7..717
               /vntifkey="21"
               /label=mCherry
  misc_feature 12501..12543
               /vntifkey="21"
               /label=möglicherweise\kein\XhoI
  enhancer 12520..12650
           /vntifkey="9"
           /label=TL\(\TEV\Leader)
  promoter 12095..12511
           /vntifkey="29"
           /label=1x35\Promoter
  misc_feature 12658..14193
               /vntifkey="21"

```

/label=AKIN10\splicing\form\1\(\und3)

BASE COUNT 3227 a 3961 c 3723 g 3285 t

ORIGIN

1 ggccgcatgg tgagcaaggg cgaggaggat aacatggcca tcatcaagga  
gttcatgcgc  
61 ttcaaggtgc acatggaggg ctccgtgaac ggccacgagt tcgagatcga  
gggcgagggc  
121 gagggccgcc cctacgaggg caccagacc gccaaagctga aggtgaccaa  
gggtggcccc  
181 ctgcccttcg cctgggacat cctgtcccct cagtcatgt acggctcaa  
ggcctacgtg  
241 aagcaccocg cgcacatccc cgactacttg aagctgtcct tccccgaggg  
cttcaagtgg  
301 gagcgcgtga tgaacttca ggacggcggc gtggtgaccg tgaccagga  
ctcctccctg  
361 caggacggcg agttcatcta caaggtgaag ctgcgcggca ccaacttccc  
ctccgacggc  
421 cccgtaatgc agaagaagac catgggctgg gaggcctcct ccgagcggat  
gtacccccgag  
481 gacggcgccc tgaagggcga gatcaagcag aggctgaagc tgaaggacgg  
cggccactac  
541 gacgctgagg tcaagaccac ctacaaggcc aagaagcccg tgcagctgcc  
cggcgctac  
601 aacgtcaaca tcaagttgga catcacctcc cacaacgagg actacacat  
cgtggaacag  
661 tacgaacgcg ccgagggccg ccaactccacc ggccgcatgg acgagctgta  
caagtaactt  
721 agagtccgca aaaatcacca gtctctctct acaaactat ctctctctat  
tttctccaga  
781 ataagtgtg agtagttccc agataagga attagggttc ttatagggtt  
tcgctcatgt  
841 gttgagcata taagaaacc ttagtatgta tttgtatttg taaaatactt  
ctatcaataa  
901 aatttctaata tcctaaaacc aaaatccagt gacctactag tgagctcgaa  
ttcactggcc  
961 gtcgttttac aacgtcgtga ctgggaaaac cctggcgta cccaacttaa  
tcgcttgca  
1021 gcacatcccc ctttcgccag ctggcgtaat agcgaagagg cccgcaccga  
tcgcccctcc  
1081 caacagttgc gcagcctgaa tggcgcccgc tcctttcgtc ttcttccctt  
cctttctcgc  
1141 cacgttcgcc ggctttcccc gtcaagctct aaatcggggg ctcccttag  
ggttccgatt  
1201 tagtgcttta cggcacctcg acccaaaaa acttgatttg ggtgatggtt  
cacgtagtgg  
1261 gccatcgcgc tgatagacgg ttttcgccc tttgacgttg gagtccacgt  
tctttaatag  
1321 tggactcttg ttccaaactg gaacaacact caaccctatc tcgggctatt  
cttttgattt  
1381 ataaggatt ttgcccattt cggaccacc atcaaacagg attttcgct  
gctggggcaa  
1441 accagcgtgg accgcttgct gcaactctct cagggccagg cggatgaagg  
caatcagctg  
1501 ttgcccgtct cactggtgaa aagaaaaacc accccagtac attaaaaacg  
tccgcaatgt  
1561 gttattaagt tgtctaagcg tcaatttgtt tacaccacaa tatacctgc  
caccagccag  
1621 ccaacagctc cccgaccggc agctcggcac aaaatcacca ctcgatacag  
gcagcccatc

1681 agtccgggac ggcgtcagcg ggagagccgt tgtaaggcgg cagactttgc  
tcatgttacc  
1741 gatgctattc ggaagaacgg caactaagct gccgggtttg aaacacggat  
gatctcgcgg  
1801 agggtagcat gttgattgta acgatgacag agcgttgctg cctgtgatca  
aatatcatct  
1861 ccctcgcaga gatccgaatt atcagccttc ttattcattt ctcgcttaac  
cgtgacaggc  
1921 tgtcgatctt gagaactatg ccgacataat aggaaatcgc tggataaagc  
cgctgaggaa  
1981 gctgagtggc gctatttctt tagaagtgaa cgttgacgat atcaactccc  
ctatccattg  
2041 ctcaccgaat ggtacaggtc ggggacccga agttccgact gtcggcctga  
tgcattcccc  
2101 gctgatcgac cccagatctg gggctgagaa agcccagtaa ggaaacaact  
gtaggttcga  
2161 gtcgagagat cccccggaac caaaggaagt aggttaaacc cgctccgatc  
aggccgagcc  
2221 acgccaggcc gagaacattg gttcctgtag gcatcgggat tggcggatca  
aacactaaag  
2281 ctactggaac gagcagaagt cctccggccg ccagttgcca ggcggtaaag  
gtgagcagag  
2341 gcacgggagg ttgccacttg cgggtcagca cggttccgaa cgccatggaa  
accgcccccg  
2401 ccaggccccg tgcgacgccg acaggatcta gcgctgcggt tgggtgcaac  
accaacagcg  
2461 ccacgccccg agttccgcaa atagccccca ggaccgcat caatcgtatc  
gggctaccta  
2521 gcagagcggc agagatgaac acgaccatca gcggctgcac agcgcctacc  
gtcggccgca  
2581 ccccgccccg caggcggtag accgaaataa acaacaagct ccagaatagc  
gaaatattaa  
2641 gtgcgcccag gatgaagatg cgcattccacc agattcccgt tggaatctgt  
cggacgatca  
2701 tcacgagcaa taaacccgcc ggcaacgccc gcagcagcat accggcgacc  
cctcggcctc  
2761 gctgttcggg ctccacgaaa acgcccgaca gatgcgcctt gtgagcgtcc  
ttggggccgt  
2821 cctcctgttt gaagaccgac agcccattga tctcgcgctc gatgtaggcg  
ccgaatgcca  
2881 cggcatctcg caaccgttca gogaacgcct ccatgggctt tttctcctcg  
tgctcgtaaa  
2941 cggaccgaa catctctgga gctttcttca gggccgaaa tcggatctcg  
cggaaatcct  
3001 gcacgtcggc cgctccaagc cgtcgaatct gagccttaat cacaattgtc  
aattttaatc  
3061 ctctgtttat cggcagttcg tagagcgcgc cgtgcgtccc gagcgatact  
gagcgaagca  
3121 agtgcgtcga gcagtgcggc cttgttcctg aatgccagt aaagcgtgg  
ctgctgaacc  
3181 ccagccgga actgaccca caaggcccta gcgtttgcaa tgcaccaggt  
catcattgac  
3241 ccaggcgtgt tccaccaggc cgctgcctcg caactcttcg caggcttcgc  
cgacctgctc  
3301 gcgccacttc ttcacgcggg tggaaatccga tccgcacatg aggcggaagg  
tttccagctt  
3361 gagcgggtac ggctcccggg gcgagctgaa atagtcgaac atccgtcggg  
ccgtcggcga  
3421 cagcttgccg tacttctccc atatgaattt cgtgtagtgg tcgccagcaa  
acagcacgac

3481 gatttcctcg tcgatcagga cctggcaacg ggacgttttc ttgccacggt  
ccaggacgcg  
3541 gaagcgggtgc agcagcgaca ccgattccag gtgccaacg cggtcggacg  
tgaagcccat  
3601 cgccgtcgcc tgtaggcgcg acaggcattc ctcggccttc gtgtaatacc  
ggccattgat  
3661 cgaccagccc aggtcctggc aaagctcgta gaacgtgaag gtgatcggct  
cgccgatagg  
3721 ggtgcgcttc gcgtactcca acacctgctg ccacaccagt tcgtcatcgt  
cggcccgcag  
3781 ctcgacgccc gtgtaggtga tcttcacgtc cttggtgacg tggaaaatga  
ccttgttttg  
3841 cagcgcctcg cgcgggattt tcttggtgcy cgtggtgaac agggcagagc  
gggcccgtgc  
3901 gtttggcatc gctcgcacg tgtccggcca cggcgcaata tcgaacaagg  
aaagctgcat  
3961 ttccttgatc tgctgcttcg tgtgtttcag caacgcggcc tgcttggcct  
cgctgacctg  
4021 ttttgccagg tcctcgccgg cggtttttcg cttcttggtc gtcatagttc  
ctcgcgtgtc  
4081 gatggtcacg gacttcgcca aacctgccgc ctctgttcg agacgacgcy  
aacgctccac  
4141 ggcggccgat ggcgcgggca gggcaggggg agccagttgc acgctgctgc  
gctcgatctt  
4201 ggccgtagct tgctggacca tcgagccgac ggactggaag gtttcgcyggg  
gcgcacgcat  
4261 gacggtgcyg cttgcgatgg tttcggcatc ctcggcggaa aaccccgct  
cgatcagttc  
4321 ttgcctgat gccttcggg caaacgtccg attcattcac cctccttgcg  
ggattgcccc  
4381 gactcacgcy ggggcaatgt gcccttattc ctgatttgac ccgctgggtg  
ccttggtgtc  
4441 cagataatcc accttatcgg caatgaagtc ggtcccgtag accgtctggc  
cgtccttctc  
4501 gtacttggtg ttccgaatct tgccctgcac gaataccagc gacccttgc  
ccaaatactt  
4561 gccgtgggcy tcggcctgag agccaaaaca cttgatgcyg aagaagtcgg  
tgcyctcctg  
4621 cttgtcgcg gcacgcttgc gccacatcta ggtactaaaa caattcatcc  
agtaaaatat  
4681 aatattttat tttctcccaa tcaggcttga tccccagtaa gtcaaaaaat  
agctcgacat  
4741 actgttcttc cccgatatcc tcctgatcy accggacgca gaaggcaatg  
tcataccact  
4801 tgtccgcct gccgcttct ccaagatcaa taaagccact tactttgcca  
tctttcacia  
4861 agatggtgct gtctcccag tcgcygtggg aaaagacaag ttcctcttcg  
ggcttttccg  
4921 tctttaaaaa atcatacagc tcgcygcyat ctttaaatgg agtgtcttct  
tcccagtttt  
4981 cycaatccac atcggccaga tcgctattca gtaagtaatc caattcggct  
aagcygctgt  
5041 ctaagctatt cgtataggga caatccgata tgcgatgga gtgaaagagc  
ctgatgcyact  
5101 ccgatacag ctcgataatc ttttcagggc tttgttcac ttcatactct  
tccgagcaaa  
5161 ggacgccatc ggcctcactc atgagcagat tgctccagcc atcatgcyct  
tcaaagtgca  
5221 ggacctttgg aacaggcagc tttccttcca gccatagcyat catgtccttt  
tcccgttcca



5281 catcataggt ggtcccttta taccggctgt ccgtcatttt taaatatagg  
ttttcatttt  
5341 ctcccaccag cttatatacc ttagcaggag acattccttc cgtatctttt  
acgcagcggg  
5401 atttttcgat cagttttttc aattccgggtg atattctcat tttagccatt  
tattatttcc  
5461 ttcctctttt ctacagtatt taaagatacc ccaagaagct aattataaca  
agacgaactc  
5521 caattcactg ttccttgcat tctaaaacct taaataccag aaaacagctt  
tttcaaagtt  
5581 gttttcaaag ttggcgtata acatagtatc gacggagccg attttgaac  
cacaattatg  
5641 ggtgatgctg ccaacttact gatttagtgt atgatgggtg ttttgagggtg  
ctccagtggc  
5701 ttctgtgtct atcagctgtc cctcctgttc agctactgac ggggtgggtgc  
gtaacggcaa  
5761 aagcaccgcc ggacatcagc gctatctctg ctctcactgc cgtaaaacat  
ggcaactgca  
5821 gttcacttac accgcttctc aaccgggtac gcaccagaaa atcattgata  
tggccatgaa  
5881 tggcgttgga tgccgggcaa cagcccgcac tatgggcggtt ggctcaaca  
cgattttacg  
5941 tcacttaaaa aactcaggcc gcagtcggta acctcgcgca tacagccggg  
cagtgacgtc  
6001 atcgtctgcg cggaaatgga cgaacagtgg ggctatgtcg gggctaaatc  
gcgccagcgc  
6061 tggtctgttt acgcgtatga cagtctccgg aagacgggtt ttgcgcacgt  
attcggtgaa  
6121 cgcactatgg cgacgctggg gcgtcttatg agcctgctgt caccctttga  
cgtggtgata  
6181 tggatgacgg atggctggcc gctgatgaa tcccgcctga agggaaagct  
gcacgtaatc  
6241 agcaagcgat atacgcagcg aattgagcgg cataacctga atctgaggca  
gcacctggca  
6301 cggctgggac ggaagtcgct gtcgttctca aaatcgggtg agctgcatga  
caaagtcac  
6361 gggcattatc tgaacataaa aactatcaa taagttggag tcattacca  
attatgatag  
6421 aatttacaag ctataagggtt attgtcctgg gtttcaagca ttagtccatg  
caagttttta  
6481 tgctttgccc attctataga tatattgata agcgcgctgc ctatgccttg  
ccccctgaaa  
6541 tccttacata cggcgatatc ttctatataa aagatatatt atcttatcag  
tattgtcaat  
6601 atattcaagg caatctgct cctcatcctc ttcacctctc tcgtcttggg  
agctttttaa  
6661 atatggcgct tcatagagta attctgtaaa ggtccaattc tcgttttcat  
acctcggat  
6721 aatcttacct atcacctcaa atggttcgct gggtttatcg caccctcgaa  
cacgagcag  
6781 gcaccgcgca cactatgcc aagaatgcc aaggtaaaaa ttgccggccc  
cgccatgaag  
6841 tccgtgaatg ccccgacggc cgaagtgaag ggcaggccgc caccagggc  
gccgccctca  
6901 ctgcccggca cctggctgct gaatgtcgat gccagcacct gcggcacgtc  
aatgcttccg  
6961 ggcgtcgcgc tcgggctgat cgcccatccc gttactgccc cgatcccggc  
aatggcaagg  
7021 actgccagcg ctgccatttt tggggtgagg ccgttcgcgg ccgagggggc  
cagcccctgg

7081 ggggatggga ggcccgcggt agcgggcccgg gagggttcga gaaggggggg  
cacccccctt  
7141 cggcgtgcgc ggtcacgcgc acagggcgca gccctggtta aaaacaaggt  
ttataaatat  
7201 tggtttaaaa gcaggtaaaa agacaggtta gcggtggccg aaaaacgggc  
ggaaaccctt  
7261 gcaaagtctg gatcttctgc ctgtggacag cccctcaaat gtcaataggt  
gcgcccctca  
7321 tctgtcagca ctctgccct caagtgtcaa ggatcgcgcc cctcatctgt  
cagtagtcgc  
7381 gcccctcaag tgtcaatacc gcagggcact tatccccagg cttgtccaca  
tcatctgtgg  
7441 gaaactcgcg taaaatcagg cgttttcgcc gatttgcgag gctggccagc  
tccacgtcgc  
7501 cggccgaaat cgagcctgcc cctcatctgt caacgccgcg ccgggtgagt  
cggcccctca  
7561 agtgtcaacg tccgcccctc atctgtcagt gagggccaag ttttccgca  
ggtatccaca  
7621 acgccggcgg gcgcggtgtc tcgcacacgg cttcgacggc gtttctggcg  
cgtttgcagg  
7681 gccatagacg gccgccagcc cagcggcgag ggcaaccagc ccggtgagcg  
tcgcaaaggc  
7741 gctcggctct gccttgctcg tcggtgatgt acttcaccag ctccgcaag  
tcgctcttct  
7801 tgatggagcg catggggacg tgcttgcaa tcacgcgcac cccccggcg  
ttttagcggc  
7861 taaaaaagtc atggctctgc cctcgggcgg accacgcca tcatgacctt  
gccaaagctg  
7921 tcctgcttct cttegatctt cgccagcagg gcgaggatcg tggcatcacc  
gaaccgcgcc  
7981 gtgcgcgggt cgtcggtgag ccagagtctc agcaggccgc ccaggcggcc  
caggtcgcca  
8041 ttgatgcggg ccagctcgcg gacgtgctca tagtccacga cgcccgtgat  
ttttagccc  
8101 tggccgacgg ccagcaggta ggccgacagg ctcatgccgg ccgccgccgc  
cttttctca  
8161 atcgtctctc gttcgtctgg aaggcagtac accttgatag gtgggctgcc  
cttcctgggt  
8221 ggcttggttt catcagccat ccgcttgccc tcatctgtta cgccggcgg  
agccggccag  
8281 cctcgcagag caggattccc gttgagcacc gccagggtgc aataaggac  
agtgaagaag  
8341 gaacaccgcg tcgcggtgg gctacttca cctatcctgc ccggtgacg  
ccgttgata  
8401 caccaaggaa agtctacag aaccctttgg caaaatcctg tatatcgtgc  
gaaaaaggat  
8461 ggatataccg aaaaaatcgc tataatgacc ccgaagcagg gttatgcagc  
ggaaaagcgc  
8521 cacgcttccc gaaggagaa aggcggacag gtatccggta agcggcaggg  
tcggaacagg  
8581 agagcgcacg agggagcttc caggggaaa cgctgggtat ctttatagtc  
ctgtcgggtt  
8641 tcgccacctc tgacttgagc gtcgattttt gtgatgctcg tcaggggggc  
ggagcctatg  
8701 gaaaaacgcc agcaacgcgg cctttttacg gttcctggcc ttttgctggc  
cttttgctca  
8761 catgttcttt cctgcgttat cccctgattc tgtggataac cgtattaccg  
cctttgagtg  
8821 agctgatacc gctcgcgcga gccgaacgac cgagcgcagc gagtcagtga  
gcgaggaagc

8881 ggaagagcgc cagaaggccg ccagagaggc cgagcgcggc cgtgaggctt  
ggacgctagg  
8941 gcagggcatg aaaaagcccc tagcgggctg ctacgggctg ctgacgcggt  
ggaaaggggg  
9001 aggggatggt gtctacatgg ctctgctgta gtgagtgggt tgcgctccgg  
cagcggtcct  
9061 gatcaatcgt caccctttct cggtccttca acgttcctga caacgagcct  
ccttttcgcc  
9121 aatccatcga caatcaccgc gagtccctgc tcgaacgctg cgtccggacc  
ggcttcgctg  
9181 aaggcgtcta tcgcgggccc caacagcggc gagagcggag cctgttcaac  
ggtgccgccc  
9241 cgctcgcccg catcgctgtc gccggcctgc tcctcaagca cggccccaac  
agtgaagtag  
9301 ctgattgtca tcagcgcatt gacggcgtcc ccggccgaaa aaccgcctc  
gcagaggaag  
9361 cgaagctgcg cgtcggccgt ttccatctgc ggtgcccccg gtcgctgccc  
ggcatggatg  
9421 cgcgcgccat cgcggtaggc gagcagcgc tcctgaagc tgcgggcatt  
cccgatcaga  
9481 aatgagcgc agtcgctgct ggctctcggc accgaatgcg tatgattctc  
cgccagcatg  
9541 gcttcggcca gtgctcgag cagcgcgcc ttgttcctga agtgccagta  
aagcgcggc  
9601 tgctgaacc ccaaccgttc cgccagttag cgtgctgctca gaccgtctac  
gccgacctg  
9661 ttcaacaggt ccagggcggc acggatcact gtattcgggt gcaactttgt  
catgcttgac  
9721 actttatcac tgataaacat aatatgtcca ccaacttata agtgataaag  
aatccgcgcg  
9781 ttcaatcgga ccagcggagg ctggctccgga ggccagacgt gaaaccaaac  
atacccctga  
9841 tcgtaattct gagcactgtc gcgctcgacg ctgtcggcat cggcctgatt  
atgccggtgc  
9901 tgccgggcct cctgcgcat ctggttact cgaacgacgt caccgcccac  
tatggcattc  
9961 tgctggcgct gtatgcgttg gtgcaatttg cctgcccacc tgtgctgggc  
gcgctgtcgg  
10021 atcgtttcgg gcggcggcca atcttgctcg tctcgtggc cggcgccaga  
tctggggaac  
10081 cctgtggttg gcatgcacat acaaatggac gaacggataa accttttcac  
gcccttttaa  
10141 atatccgatt attctaataa acgctctttt ctcttaggtt taccgcca  
tatacctgt  
10201 caaactga tagtttaaac tgaaggcggg aaacgacaat ctgatcatga  
gcggagaatt  
10261 aaggagtc cgttatgacc cccgccgatg acgcccgaca agccgtttta  
cgtttggaac  
10321 tgacagaacc gcaacgttga aggagccact cagcccggg tttctggagt  
ttaatgagct  
10381 aagcacatac gtcagaaacc attattgctg gttcaaaagt cgcctaaggt  
cactatcagc  
10441 tagcaaatat ttcttgtaa aaatgctcca ctgacgttcc ataaattccc  
ctcggtatcc  
10501 aattagagtc tcatattcac tctcaactcg atcgaggggg atctaccatg  
agcccagaac  
10561 gacgcccggc cgacatccgc cgtgccaccg aggcggacat gccggcggtc  
tgcaccatcg  
10621 tcaaccacta catccagaca agcacggtca acttccgtac cgagccgag  
gaaccgcagg

10681 agtggacgga cgacctcgtc cgtctgcggg agcgctatcc ctggctcgtc  
gccgaggtgg  
10741 acggcgaggt cgccggcatc gcctacgcgg gtccctggaa ggcacgcaac  
gcctacgact  
10801 ggacggccga gtcgaccgtg tacgtctccc cccgccacca gcggacggga  
ctgggctcca  
10861 cgctctacac ccacctgctg aagtccctgg aggcacaggg cttcaagagc  
gtggtcgctg  
10921 tcatcgggct gcccaacgac ccgagcgtgc gcatgcacga ggcgctcgga  
tatgcccc  
10981 gcggcatgct gcgggcggcc ggcttcaagc acgggaactg gcatgacgtg  
ggtttctggc  
11041 agctggactt cagcctgccc gtgccgcccc gtccggctct gcccgtcacc  
gaaatctgat  
11101 gaccctaga gtcaagcaga tcggtcaaac atttggcaat aaagtttctt  
aagattgaat  
11161 cctggtgccc gtcttgcat gattatcata taatttctgt tgaattacgt  
taagcatgta  
11221 ataattaaca tgtaatgcat gacgttattt atgagatggg tttttatgat  
tagagtcccc  
11281 caattataca ttaatacgc gatagaaaac aaaatatagc gcgcaacta  
ggataaatta  
11341 tcgcgcgcggtg tgcctctat gttactagat cgggcctcct gtcaatgctg  
gcggcggtc  
11401 tgggtgggtg tctgggtggc gctctgaggg tgggtggctct gaggggtggc  
gttctgaggg  
11461 tggcggctct gagggaggcg gttccgggtg tggctctggg tccggtgatt  
ttgattatga  
11521 aaagatggca aacgctaata agggggctat gaccgaaaat gccgatgaaa  
acgcgctaca  
11581 gtctgacgct aaaggcaaac ttgattctgt cgctactgat tacggtgctg  
ctatcgatgg  
11641 tttcattggg gacgtttccg gccttgctaa tggtaatggg gctactgggtg  
atthtctggg  
11701 ctctaattcc caaatggctc aagtcgggtga cggtgataat tcacctttaa  
tgaataattt  
11761 ccgtcaatat ttacctccc tccctcaatc ggttgaatgt cgcccttttg  
tctttggccc  
11821 aatacgcaaa ccgcctctcc ccgcgcggtg gccgattcat taatgcagct  
ggcacgacag  
11881 gtttcccgac tggaaagcgg gcagtgagcg caacgcaatt aatgtgagtt  
agctcactca  
11941 ttaggcaccc caggctttac actttatgct tccggctcgt atgttggtg  
gaattgtgag  
12001 cggataaaa tttcacacag gaaacagcta tgaccatgat tacgccaagc  
ttgcatgcct  
12061 gcaggtcgac tctagaggat ccccggtac cgtcaacatg gtggagcacg  
acacacttgt  
12121 ctactccaaa aatatcaaag atacagtctc agaagaccaa agggcaattg  
agacttttca  
12181 acaaagggtg atatccgaa acctcctcgg attccattgc ccagctatct  
gtcactttat  
12241 tgtgaagata gtggaaaagg aaggtggctc ctacaaatgc catcattgag  
ataaaggaaa  
12301 ggccatcgtt gaagatgcct ctgccgacag tgggtcccaa gatggacccc  
caccacgag  
12361 gagcatcgtg gaaaaagaag acgttccaac cacgtcttca aagcaagtgg  
attgatgtga  
12421 tatctccact gacgtaaggg atgacgcaca atcccactat ccttcgcaag  
acccttctc

12481 tatataagga agttcatttc atttggagag gacctcgacc tcaacacaac  
atatacaaaa  
12541 caaacgaatc tcaagcaatc aagcattcta cttctattgc agcaatttaa  
atcatttctt  
12601 ttaaagcaaa agcaattttc tgaaaatttt caccatttac gaacgatagc  
cgggcccatg  
12661 gatggatcag gcacaggcag tagaagtggg gtagaatcga ttctaccaa  
ttacaagctt  
12721 gggagaactc ttggtattgg ttcccttggg aggggtgaaga tagctgagca  
tgcattgaca  
12781 ggacataagg ttgctatcaa gatcctcaat cgtcgcaaaa tcaagaacat  
ggagatggag  
12841 gagaaagtga ggagagagat caaaatcttg agactattta tgcacctca  
catcatccgt  
12901 ctctatgagg ttatagagac tcccacagat atttatcttg tcatggagta  
tgtgaactct  
12961 ggtgagctat ttgactatat tgttgagaag ggtagattgc aggaggatga  
ggcgaggaac  
13021 ttttttcagc agataatatac aggagtggaa tactgccatc gaaacatggt  
ggttcacaga  
13081 gacctcaagc ctgaaaactt gcttttggac tctaaatgca atgtaaagat  
tgctgatttt  
13141 ggcctgagca acataatgag agatggatcat tttttgaaga caagttgtgg  
aagtccaaat  
13201 tatgcccgtc cagaggtaat ttcgggcaag ttatatgctg gccctgaagt  
agatgtctgg  
13261 agctgtgggtg tgataactta cgctcttctc tgtgggacgc ttccatttga  
tgatgaaaaac  
13321 attcccacc tttttaagaa gataaaggga gggatataca cattacctag  
ccatttatct  
13381 cctgggtgcta gagatttgat cccccggatg cttgtagttg accccatgaa  
acgagtaacc  
13441 atccctgaga tccggcaaca cccttggttc caagctcatc ttccgaggta  
tttagctggt  
13501 cctcctccag atactgtgca acaggcaaaa aagattgacg aggagattct  
ccaagaagtt  
13561 atcaatatgg gatttgacag aaaccacctc atcgaatcgc tccgcaaccg  
aaccagaat  
13621 gatggcactg tgacgtacta tctgatactg gacaatcgtt tccgtgcctc  
tagtggttat  
13681 ctcggggctg agtttcaaga gaccatggaa ggtactcccc gtatgcatcc  
agcagaaagc  
13741 gttgcttcac ctgtagcca tcggcttcca ggactgatgg aatatcaagg  
agttggcttg  
13801 agatctcaat accctggtga gagaaaatgg gctcttggac ttcagtctcg  
ggctcatccc  
13861 cgtgaaataa tgacggaagt cctgaaagcc ctgcaagatt tgaatgtatg  
ttggaagaag  
13921 atagggcact acaacatgaa gtgcagatgg gttcctaaca gcagcgcaga  
tggtatgctc  
13981 agtaactcga tgcacgataa caactacttt ggagacgagt ccagcataat  
agagaacgaa  
14041 gcagctgtta agtcgccccaa tgttgtcaag tttgaaattc agttgtataa  
aactcgggac  
14101 gacaagtatc tactggattt gcagagagta caaggctcctc agttcttgtt  
cttggatctg  
14161 tgtgctgctt ttcttgctca gctccgagtc ctctgc

//

## Supplementary File S3

```

LOCUS      Atraptor1b\YFP\i          9501 bp    DNA    circular    1-
JUL-2015
SOURCE
  ORGANISM
COMMENT    This file is created by Vector NTI
           http://www.invitrogen.com/
COMMENT    VNTDATE|738342882|
COMMENT    VNTDBDATE|738342882|
COMMENT    LSOWNER|
COMMENT    VNTNAME|Atraptor1b YFP in pQE80L fw (ML742)|
COMMENT    VNTAUTHORNAME|Bernhard Wurzinger|
FEATURES   Location/Qualifiers
   misc_feature   6..4040
                 /vntifkey="21"
                 /label=Atraptor1b
   misc_feature   8775..9500
                 /vntifkey="21"
                 /label=YFP
   promoter       8631..8711
                 /vntifkey="30"
                 /label=T5\promoter/lac\operator\element
   misc_feature   8685..8685
                 /vntifkey="21"
                 /label=T5\transcription\start
   misc_feature   8751..8768
                 /vntifkey="21"
                 /label=6x\His\tag\coding\sequence
   terminator     4081..4175
                 /vntifkey="43"
                 /label=lambda\t0\transcriptional\termination\region
   terminator     4937..5034
                 /vntifkey="43"
                 /label=rrnB\T1\transcriptional\termination\region
   misc_feature   complement(5125..6206)
                 /vntifkey="21"
                 /label=lacI
   rep_origin     6801..6801
                 /vntifkey="33"
                 /label=ColE1\origin\of\replication
   misc_feature   complement(7559..8419)
                 /vntifkey="21"
                 /label=Beta-lactamase\CDS\ (AmpR)
   misc_feature   complement(5122..6081)
                 /vntifkey="21"
                 /label=lac\repressor>true\CDS
BASE COUNT      2353 a          2347 c          2367 g          2434 t
ORIGIN
    1 ccgggatggc attaggagac ttaatggtgt ctcggttctc gcaatcttct
      gtttctttgg
    61 tctccaatca ccgttacgac gaagactgtg tctctagtca cgatgacggt
      gattcccgga
    121 ggaaggattc tgaggctaag agcagtagta gctacgggaa tggtaacaacg
      gagggagccg
    181 ccaccgccac cagcatggct tacttgctc agactattgt gctctgcgag
      cttagacacg
    241 acgcatccga ggcttctgct cccttgggga cttctgagat cgtattggtc
      cccaaatggc
    301 ggcttaaaga acgaatgaaa acaggatgtg tagctttagt tctgtgttta
      aacattactg

```

361 ttgatccgcc ggatgttata aagatatctc cttgtgctag aatcgaggca  
tggatagatc  
421 cattttctat ggcaccgcct aaagctctcg agacaattgg aaaaaatttg  
agcactcagt  
481 atgagagatg gcaaccagg gcccgtata aggttcagct tgatccgaca  
gtagatgagg  
541 tgaggaagct gtgcttgact tgtcggaaat atgcaaagac cgagagagtt  
ctattccatt  
601 ataatgggca tgggtgtgcca aaacctacag ctaatggtga aatttgggta  
ttaaacaaga  
661 gttatacaca gtacattccc ttgccaatca gtgaacttga ttcttgggtg  
aagacaccct  
721 ccatctatgt tttcgactgc tctgctgcta ggatgattct gaatgccttt  
gctgagcttc  
781 atgattgggg ttcttctgggt tcctctggat cctcaagggga ctgcattcta  
cttctgctt  
841 gtgatgtaca tgagacactt cctcagagcg ttgagtttcc agctgatggt  
tttacgtctt  
901 gcctgacaac gccattaaa atggcgttga aatggttctg caggcgttcg  
cttctgaaag  
961 aaattatcga tgaatcactt atcgacagga ttccaggccg gcaaaacgat  
cgtaagacat  
1021 tgttagggga gttgaactgg attttcacag cagtgacgga tacaattgct  
tggaatgtgc  
1081 ttctcatga acttttccag agattattca gacaggactt gttggtcgct  
agccttttcc  
1141 ggaatttctt acttctgag agaataatgc ggtccgcaaa ctgtaatcca  
atatctcacc  
1201 ctatgctgcc tcctacgcat caacatcata tgtgggatgc atgggacatg  
gctgctgaaa  
1261 tctgtctttc tcagcttccc caacttgttc tggacccaag cacagagttc  
cagccaagtc  
1321 cgttttttac tgagcaactg acagcttttg aggtgtggct tgatcatgga  
tctgagcata  
1381 agaagccacc ggagcagtta cctattgttc ttcagggtgtt acttagccag  
tgccatcggg  
1441 ttcgtgctct tgtacttctt ggaagatttc ttgatatggg ttcatgggct  
gtggatctgg  
1501 ccttgtctgt tggaatattc ccatatgtgc tgaagcttct gcaaacaaca  
acgaatgagc  
1561 taagacagat cctggttttc atatggacaa aaattcttgc acttgacaag  
tcatgtcaaa  
1621 ttgatcttgt gaaggatggg gggcatacat acttcatacg atttctagat  
agctcgggtg  
1681 catttccaga acaacgagct atggctgctt ttgttctggc tgtcattgtg  
gatggacatc  
1741 gacgaggcca ggaagcatgt cttgaagcta atttaattgg tgtttgtctc  
gggcaccttg  
1801 aagcatccag accaagtgat ccacaaccag aaccattggt tctacaatgg  
ctttgtcttt  
1861 gtcttggaaa gttatgggaa gattttatgg aggcccaaat aatgggcagg  
gaggcaaatg  
1921 cttttgaaaa gttggcacct ctgctttccg agccccaacc tgaggtaagg  
gctgctgcag  
1981 tttttgccct gggtaccttg cttgatattg ggtttgactc taataaaagt  
gtggtggagg  
2041 atgaatttga tgatgatgaa aagattagag ccgaagacgc tatcattaa  
agtctcttag  
2101 atgtagtttc agatgggagt ccacttgtcc gagcagaggt tgccgtagct  
cttgcacggt

2161 ttgcctttgg ccacaaacag caccttaagt tagccgcagc ttcattattgg  
aagcctcagt  
2221 caagttcttt gcttacttct ctaccttcaa tagctaaatt ccatgatcct  
gggagtgcaa  
2281 caattgtttc tttacacatg agtcctctga ctagagctag cacggatagc  
caaccagtgg  
2341 ctcgtgagtc taggatctca agcagccctc ttggctcctc tgggctgatg  
caaggatctc  
2401 cattatctga tgattcttcg ttacattctg attctggaat gatgcatgac  
agtgtcagca  
2461 atggagcggg ccatcagcca agactggttg ataatgctgt ttattcgcag  
tgcgtccgag  
2521 ctatgtttgc attagctaaa gatccatctc cacgtattgc aagtctcgga  
cggcgtgtgc  
2581 tttctattat tggaatcgaa caggttggtg cgaaaccctc gaagcccact  
ggccgaccag  
2641 gggaaagctgc aacgacatct cacactccac ttgctggcct agctcgttca  
tcctcatggg  
2701 ttgatatgca tgcaggtaat ctgcctttaa gttttaggac tccccggtc  
agcccccta  
2761 gaacaaacta cctgagtgga ttgaggagag tttgttcatt agagttcagg  
cctcatctat  
2821 tgggttcacc cgactcagga ttggctgatc cgcttttagg cgccagtgga  
tctgaacgga  
2881 gtttgcttcc actatcaact atctacggct ggagttgtgg gcacttttct  
aagccacttc  
2941 ttggtggtgc ggatgctagt caagagattg cagccaaaag agaagagaaa  
gaaaaattcg  
3001 cacttgagca tattgcaaaa tgccagcact cttctattag caagctcaac  
aataatccta  
3061 ttgccaaactg ggatacaagg tttgaaacgg gaacaaagac agcctcctt  
cacccattct  
3121 ctctatttgt agttgctgca gacgagaatg aacggatcag agtgtggaac  
tatgaggaag  
3181 caactcttct caatggcttt gacaatcatg attttctga caaaggaatt  
tcaaagctct  
3241 gcctcatcaa tgaacttgac gactctctgc tacttgttgc atcatgcat  
gggtcggctc  
3301 ggatatggaa aaactatgca actaagggtg aacaaaagct tgttactggg  
ttttcttcaa  
3361 tccaggggtca caagcccggg gcccgctgact tgaacgctgt cgtggactgg  
caacaacagt  
3421 ccggttacct gtatgcttct ggggagacgt caacagtcac actttgggac  
ctggagaaaag  
3481 aacagcttgt cagatctggt ccctctgaat cagaatgtgg agttacagca  
ctttctgctt  
3541 ctcaagtgca cggaggccaa ctcgctgctg gttttgctga tggatctttg  
agactctatg  
3601 atgttcggtc acctgaaccg cttgtctgct cgactcggcc tcatcagaaa  
gttgaaaggg  
3661 tggttggcct cagttttcaa cctggacttg accccgcaaa ggtggtgagt  
gcatcacagg  
3721 cgggtgacat acagtttctt gaccttagaa caacaagga cacatacctg  
acgattgatg  
3781 cacacagggg ttactcacg gccttagctg ttcacagaca cgctccaata  
atcgcgagtg  
3841 gatctgcaaa acagctcatt aaagtattca gtcttcaagg ggaacaacta  
gggataatcc  
3901 gctactacc atccttcatg gctcaaaaga ttggatcagt gagggtcctc  
acatttcatc



3961 cgtaccaggt tctgctagca gctggagctg ctgactcatt tgtctccata  
tacaccacg  
4021 acaactcgca agcaagatga cccgggtcga cctgcagcca agcttaatta  
gctgagcttg  
4081 gactcctggt gatagatcca gtaatgacct cagaactcca tctggatttg  
ttcagaacgc  
4141 tcggttgccg ccgggcgttt tttattggtg agaatccaag ctagcttggc  
gagattttca  
4201 ggagctaagg aagctaaaat ggagaaaaaa atcactggat ataccaccgt  
tgatatatcc  
4261 caatggcatc gtaaagaaca ttttgaggca tttcagtcag ttgctcaatg  
tacctataac  
4321 cagaccgttc agctggatat tacggccttt ttaaagaccg taaagaaaa  
taagcacaag  
4381 ttttatccgg cctttattca cattcttgcc cgcctgatga atgctcatcc  
ggaatttcgt  
4441 atggcaatga aagacggtga gctggtgata tgggatagtg ttcacccttg  
ttacaccggt  
4501 ttccatgagc aaactgaaac gttttcatcg ctctggagtg aataccacga  
cgatttccgg  
4561 cagtttctac acatatattc gcaagatgtg gcgtgttacg gtgaaaacct  
ggcctatttc  
4621 cctaaagggg ttattgagaa tatgtttttc gtctcagcca atccctgggt  
gagtttcacc  
4681 agttttgatt taaacgtggc caatatggac aacttcttcg cccccgttt  
caccatgggc  
4741 aatattata cgcaaggcga caagggtgctg atgccgctgg cgattcaggt  
tcatcatgcc  
4801 gtttgtgatg gcttccatgt cggcagaatg cttaatgaat tacaacagta  
ctgcgatgag  
4861 tggcagggcg gggcgtaatt tttttaaggc agttattggt gcccttaaac  
gcctggggta  
4921 atgactctct agcttgaggc atcaaataaa acgaaaggct cagtcgaaag  
actgggcctt  
4981 tcgttttatc tgttgtttgt cggtgaaacgc tctcctgagt aggacaaatc  
cgccctctag  
5041 attacgtgca gtcgatgata agctgtcaaa catgagaatt gtgcctaatg  
agtgaagctaa  
5101 cttacattaa ttgcgttgcg ctcaactgcc gctttccagt cgggaaacct  
gtcgtgccag  
5161 ctgcattaat gaatcggcca acgcgcgggg agaggcgggt tgcgtattgg  
gcgccagggg  
5221 ggtttttctt ttcaccagtg agacgggcaa cagctgattg cccttcaccg  
cctggccctg  
5281 agagagttgc agcaagcggg ccacgctggt ttgccccagc aggcgaaaat  
cctgtttgat  
5341 ggtggttaac ggcgggatat aacatgagct gtcttcggta tcgtcgtatc  
ccactaccga  
5401 gatatccgca ccaacgcgca gcccgactc ggtaatggcg cgcattgcgc  
ccagcggcat  
5461 ctgatcgttg gcaaccagca tcgcagtggg aacgatgcc tcattcagca  
tttgcattgg  
5521 ttggtgaaaa ccggacatgg cactccagtc gccttcccgt tccgctatcg  
gctgaatttg  
5581 attgcgagtg agatatttat gccagccagc cagacgcaga cgcgccgaga  
cagaacttaa  
5641 tgggcccgct aacagcgcga tttgctggtg acccaatgcg accagatgct  
ccacgccag  
5701 tcgcgtaccg tcttcatggg agaaaataat actgttgatg ggtgtctggt  
cagagacatc

5761 aagaaataac gccggaacat tagtgcaggc agcttccaca gcaatggcat  
cctggtcatc  
5821 cagcggatag ttaatgatca gccactgac gcgttgcgcy agaagattgt  
gcaccgccgc  
5881 tttacaggct tcgacgccgc ttcgttctac catcgacacc accacgctgg  
caccagttg  
5941 atcggcgcga gatttaatcg ccgcgacaat ttgcgacggc gcgtgcaggg  
ccagactgga  
6001 ggtggcaacg ccaatcagca acgactgttt gcccgccagt tgttggtcca  
cgcggttggg  
6061 aatgtaattc agctccgcca tcgccgcttc cactttttcc cgcgttttcg  
cagaaacgtg  
6121 gctggcctgg ttcaccacgc gggaaacggt ctgataagag acaccggcat  
actctgcgac  
6181 atcgtataac gttactgggt tcacattcac caccctgaat tgactctctt  
ccgggcgcta  
6241 tcatgccata ccgcgaaagg ttttgcacca ttcgatgggtg tcggaatttc  
gggcagcgtt  
6301 gggtcctggc cacgggtgcy catgatctag agctgcctcg cgcgtttcgg  
tgatgacggg  
6361 gaaaacctct gacacatgca gctcccggag acggtcacag cttgtctgta  
agcggatgcc  
6421 gggagcagac aagcccgtca gggcgcgtca gcgggtggtg gcgggtgctg  
gggcgcagcc  
6481 atgaccagc cacgtagcga tagcggagtg tatactgggt taactatgcy  
gcatcagagc  
6541 agattgtact gagagtgcac catatgcggg gtgaaatacc gcacagatgc  
gtaaggagaa  
6601 aataccgcat caggcgtctt tccgcttctt cgctcaactga ctcgctgcgc  
tcggctcgtt  
6661 ggctgcggcg agcgggtatca gctcaactcaa aggcggtaat acggttatcc  
acagaatcag  
6721 gggataacgc aggaaagaac atgtgagcaa aaggccagca aaaggccagg  
aaccgtaaaa  
6781 aggcgcggtt gctggcggtt tccatagggc tccgcccccc tgacgagcat  
cacaanaatc  
6841 gacgctcaag tcagaggtgg cgaanaaccga caggactata aagataccag  
gcgtttcccc  
6901 ctggaagctc cctcgtgcgc tctcctgttc cgaccctgcc gcttaccgga  
tacctgtccg  
6961 cttttctccc ttcgggaagc gtggcgcttt ctcatagctc acgctgtagg  
tatctcagtt  
7021 cgggtgtaggt cgctcgtctc aagctgggct gtgtgcacga accccccgtt  
cagcccagcc  
7081 gctgcgcctt atccggtaac tatcgtcttg agtccaacct ggtaagacac  
gacttatcgc  
7141 cactggcagc agccactggg aacaggatta gcagagcgag gtatgtaggc  
ggtgctacag  
7201 agttcttgaa gtggtggcct aactacggct aactagaag gacagtattt  
ggtatctgcy  
7261 ctctgctgaa gccagttacc ttcggaaaaa gagttggtag ctcttgatcc  
ggcaanaaaa  
7321 ccaccgctgg tagcgggtgg tttttgttt gcaagcagca gattacgcgc  
agaaaaaag  
7381 gatctcaaga agatcctttg atcttttcta cggggtctga cgctcagtg  
aacgaaaact  
7441 cacgttaagg gattttggtc atgagattat caaaaaggat cttcacctag  
atccttttaa  
7501 attaaaaatg aagttttaaa tcaatctaaa gtatatatga gtaaacttgg  
tctgacagtt

7561 accaatgctt aatcagtgag gcacctatct cagcgatctg tctatttcgt  
tcatccatag  
7621 ttgcctgact ccccgctcgtg tagataacta cgatacggga gggcttacca  
tctggcccca  
7681 gtgctgcaat gataccgca gaccacgct caccggctcc agatttatca  
gcaataaacc  
7741 agccagccgg aagggccgag cgcagaagtg gtccctgcaac tttatccgcc  
tccatccagt  
7801 ctattaattg ttgccgggaa gctagagtaa gtagttcgcc agttaatagt  
ttgcgcaacg  
7861 ttggtgcat tgctacaggc atcgtggtgt cacgctcgtc gtttggtatg  
gcttcattca  
7921 gctccggttc ccaacgatca aggcgagtta catgatcccc catgttgtgc  
aaaaaagcgg  
7981 ttagctcctt cggctcctcc atcgttgtca gaagtaagtt ggccgcagtg  
ttatcactca  
8041 tggttatggc agcactgcat aattctctta ctgtcatgcc atccgtaaga  
tgcttttctg  
8101 tgactggtga gtactcaacc aagtattctt gagaatagtg tatgcccga  
ccgagttgct  
8161 cttgcccggc gtcaatacgg gataataccg cgccacatag cagaacttta  
aaagtgtca  
8221 tcattggaaa acgttcttcg gggcgaaaac tctcaaggat cttaccgctg  
ttgagatcca  
8281 gttcgatgta acccactcgt gcaccaact gatcttcagc atcttttact  
ttcaccagcg  
8341 tttctgggtg agcaaaaaca ggaaggcaaa atgccgcaaa aaaggaata  
aggcgacac  
8401 ggaaatggtg aatactcata ctcttccttt ttcaatatta ttgaagcatt  
tatcagggtt  
8461 attgtctcat gagcggatac atatttgaat gtatttagaa aaataaaca  
ataggggttc  
8521 cgcgcacatt tccccgaaa gtgccacctg acgtctaaga aaccattatt  
atcatgacat  
8581 taacctataa aatagggct atcacgaggc ctttctgtct tcacctcgag  
aatcataaa  
8641 aaatttattt gctttgtgag cggataaaca ttataataga ttcaattgtg  
agcggataac  
8701 aatttcacac agaattcatt aaagaggaga aattaactat gagaggatcg  
catcaccatc  
8761 accatcacgg atccatggtg agcaagggcg aggagctggt caccgggggtg  
gtgccatcc  
8821 tggctgagct ggacggcgac gtaaacggcc acaagttcag cgtgtccggc  
gagggcgagg  
8881 gcgatgccac ctacggcaag ctgaccctga agttcatctg caccaccggc  
aagctgcccg  
8941 tgcctggcc caccctcgtg accaccttcg gctacggcgt gcagtgttc  
gcccgtacc  
9001 ccgaccacat gaagcagcac gacttcttca agtccgccat gccgaaggc  
tacgtccagg  
9061 agcgcacat cttcttcaag gacgacggca actacaagac ccgcgccgag  
gtgaagtctg  
9121 agggcgacac cctggtgaac cgcacgagc tgaagggcat cgacttcaag  
gaggacggca  
9181 acatcctggg gcacaagctg gagtacaact acaacagcca caacgtctat  
atcatggccg  
9241 acaagcagaa gaacggcatc aaggtgaact tcaagatccg ccacaacatc  
gaggacggca  
9301 gcgtgcagct cgccgaccac taccagcaga acaccccat cggcgacggc  
cccgtgctgc

9361 tgcccgaaa ccactacctg agtaccagt ccgccctgag caaagacccc  
aacgagaagc

9421 gcgatcacat ggtcctgctg gagttcgtga ccgccgccgg gatcactctc  
ggcatggacg

9481 agctgtacaa gagcggggcg c  
//

## Supplementary File S4

```

<?xml version="1.0" encoding="UTF-8"?>
<sbml version="1" level="2" xmlns="http://www.sbml.org/sbml/level2">
- <model name="Arabidopsis thaliana Model V1 bZip and AKin Analysis">
  - <listOfCompartments>
    <compartment name="rootCompartment" constant="true" size="1"
      spatialDimensions="3" id="rootCompartment"/>
  </listOfCompartments>
  - <listOfSpecies>
    <species name="AC" constant="false" id="AC" boundaryCondition="false"
      hasOnlySubstanceUnits="true" initialAmount="1"
      compartment="rootCompartment"/>
    <species name="Gly" constant="false" id="Gly" boundaryCondition="false"
      hasOnlySubstanceUnits="true" initialAmount="1"
      compartment="rootCompartment"/>
    <species name="Ser" constant="false" id="Ser" boundaryCondition="false"
      hasOnlySubstanceUnits="true" initialAmount="1"
      compartment="rootCompartment"/>
    <species name="Suc" constant="false" id="Suc" boundaryCondition="false"
      hasOnlySubstanceUnits="true" initialAmount="1"
      compartment="rootCompartment"/>
    <species name="Fru" constant="false" id="Fru" boundaryCondition="false"
      hasOnlySubstanceUnits="true" initialAmount="1"
      compartment="rootCompartment"/>
    <species name="Glc" constant="false" id="Glc" boundaryCondition="false"
      hasOnlySubstanceUnits="true" initialAmount="1"
      compartment="rootCompartment"/>
    <species name="Gal" constant="false" id="Gal" boundaryCondition="false"
      hasOnlySubstanceUnits="true" initialAmount="1"
      compartment="rootCompartment"/>
    <species name="Raf" constant="false" id="Raf" boundaryCondition="false"
      hasOnlySubstanceUnits="true" initialAmount="1"
      compartment="rootCompartment"/>
    <species name="Mel" constant="false" id="Mel" boundaryCondition="false"
      hasOnlySubstanceUnits="true" initialAmount="1"
      compartment="rootCompartment"/>
    <species name="Gol" constant="false" id="Gol" boundaryCondition="false"
      hasOnlySubstanceUnits="true" initialAmount="1"
      compartment="rootCompartment"/>
    <species name="myoIn" constant="false" id="myoIn" boundaryCondition="false"
      hasOnlySubstanceUnits="true" initialAmount="1"
      compartment="rootCompartment"/>
    <species name="Asc" constant="false" id="Asc" boundaryCondition="false"
      hasOnlySubstanceUnits="true" initialAmount="1"
      compartment="rootCompartment"/>
    <species name="Shikimate" constant="false" id="Shikimate"
      boundaryCondition="false" hasOnlySubstanceUnits="true" initialAmount="1"
      compartment="rootCompartment"/>
    <species name="Phe" constant="false" id="Phe" boundaryCondition="false"
      hasOnlySubstanceUnits="true" initialAmount="1"
      compartment="rootCompartment"/>
    <species name="Tyr" constant="false" id="Tyr" boundaryCondition="false"
      hasOnlySubstanceUnits="true" initialAmount="1"
      compartment="rootCompartment"/>
  </listOfSpecies>
</model>
</sbml>

```

```
<species name="Trp" constant="false" id="Trp" boundaryCondition="false"
  hasOnlySubstanceUnits="true" initialAmount="1"
  compartment="rootCompartment"/>
<species name="Pyr" constant="false" id="Pyr" boundaryCondition="false"
  hasOnlySubstanceUnits="true" initialAmount="1"
  compartment="rootCompartment"/>
<species name="Val" constant="false" id="Val" boundaryCondition="false"
  hasOnlySubstanceUnits="true" initialAmount="1"
  compartment="rootCompartment"/>
<species name="Leu" constant="false" id="Leu" boundaryCondition="false"
  hasOnlySubstanceUnits="true" initialAmount="1"
  compartment="rootCompartment"/>
<species name="Ala" constant="false" id="Ala" boundaryCondition="false"
  hasOnlySubstanceUnits="true" initialAmount="1"
  compartment="rootCompartment"/>
<species name="Cit" constant="false" id="Cit" boundaryCondition="false"
  hasOnlySubstanceUnits="true" initialAmount="1"
  compartment="rootCompartment"/>
<species name="Asp" constant="false" id="Asp" boundaryCondition="false"
  hasOnlySubstanceUnits="true" initialAmount="1"
  compartment="rootCompartment"/>
<species name="Met" constant="false" id="Met" boundaryCondition="false"
  hasOnlySubstanceUnits="true" initialAmount="1"
  compartment="rootCompartment"/>
<species name="Lys" constant="false" id="Lys" boundaryCondition="false"
  hasOnlySubstanceUnits="true" initialAmount="1"
  compartment="rootCompartment"/>
<species name="Asn" constant="false" id="Asn" boundaryCondition="false"
  hasOnlySubstanceUnits="true" initialAmount="1"
  compartment="rootCompartment"/>
<species name="Thr" constant="false" id="Thr" boundaryCondition="false"
  hasOnlySubstanceUnits="true" initialAmount="1"
  compartment="rootCompartment"/>
<species name="Ile" constant="false" id="Ile" boundaryCondition="false"
  hasOnlySubstanceUnits="true" initialAmount="1"
  compartment="rootCompartment"/>
<species name="KGA" constant="false" id="KGA" boundaryCondition="false"
  hasOnlySubstanceUnits="true" initialAmount="1"
  compartment="rootCompartment"/>
<species name="Succ" constant="false" id="Succ" boundaryCondition="false"
  hasOnlySubstanceUnits="true" initialAmount="1"
  compartment="rootCompartment"/>
<species name="Fum" constant="false" id="Fum" boundaryCondition="false"
  hasOnlySubstanceUnits="true" initialAmount="1"
  compartment="rootCompartment"/>
<species name="Mal" constant="false" id="Mal" boundaryCondition="false"
  hasOnlySubstanceUnits="true" initialAmount="1"
  compartment="rootCompartment"/>
<species name="Oxac" constant="false" id="Oxac" boundaryCondition="false"
  hasOnlySubstanceUnits="true" initialAmount="1"
  compartment="rootCompartment"/>
```

```

<species name="Pro" constant="false" id="Pro" boundaryCondition="false"
  hasOnlySubstanceUnits="true" initialAmount="1"
  compartment="rootCompartment"/>
<species name="Orn" constant="false" id="Orn" boundaryCondition="false"
  hasOnlySubstanceUnits="true" initialAmount="1"
  compartment="rootCompartment"/>
<species name="Arg" constant="false" id="Arg" boundaryCondition="false"
  hasOnlySubstanceUnits="true" initialAmount="1"
  compartment="rootCompartment"/>
<species name="Put" constant="false" id="Put" boundaryCondition="false"
  hasOnlySubstanceUnits="true" initialAmount="1"
  compartment="rootCompartment"/>
<species name="Spdine" constant="false" id="Spdine" boundaryCondition="false"
  hasOnlySubstanceUnits="true" initialAmount="1"
  compartment="rootCompartment"/>
<species name="Glu" constant="false" id="Glu" boundaryCondition="false"
  hasOnlySubstanceUnits="true" initialAmount="1"
  compartment="rootCompartment"/>
<species name="Gln" constant="false" id="Gln" boundaryCondition="false"
  hasOnlySubstanceUnits="true" initialAmount="1"
  compartment="rootCompartment"/>
</listOfSpecies>
- <listOfParameters>
  <parameter name="k1" constant="true" id="k1" value="1"/>
  <parameter name="k2" constant="true" id="k2" value="1"/>
  <parameter name="k3" constant="true" id="k3" value="1"/>
  <parameter name="k4" constant="true" id="k4" value="1"/>
  <parameter name="k5" constant="true" id="k5" value="1"/>
  <parameter name="k6" constant="true" id="k6" value="1"/>
  <parameter name="k7" constant="true" id="k7" value="1"/>
  <parameter name="k8" constant="true" id="k8" value="1"/>
  <parameter name="k9" constant="true" id="k9" value="1"/>
  <parameter name="k10" constant="true" id="k10" value="1"/>
  <parameter name="k11" constant="true" id="k11" value="1"/>
  <parameter name="k12" constant="true" id="k12" value="1"/>
  <parameter name="k13" constant="true" id="k13" value="1"/>
  <parameter name="k14" constant="true" id="k14" value="1"/>
  <parameter name="k15" constant="true" id="k15" value="1"/>
  <parameter name="k16" constant="true" id="k16" value="1"/>
  <parameter name="k17" constant="true" id="k17" value="1"/>
  <parameter name="k18" constant="true" id="k18" value="1"/>
  <parameter name="k19" constant="true" id="k19" value="1"/>
  <parameter name="k20" constant="true" id="k20" value="1"/>
  <parameter name="k21" constant="true" id="k21" value="1"/>
  <parameter name="k22" constant="true" id="k22" value="1"/>
  <parameter name="k23" constant="true" id="k23" value="1"/>
  <parameter name="k24" constant="true" id="k24" value="1"/>
  <parameter name="k25" constant="true" id="k25" value="1"/>
  <parameter name="k26" constant="true" id="k26" value="1"/>
  <parameter name="k27" constant="true" id="k27" value="1"/>
  <parameter name="k28" constant="true" id="k28" value="1"/>
  <parameter name="k29" constant="true" id="k29" value="1"/>
  <parameter name="k30" constant="true" id="k30" value="1"/>

```

```

<parameter name="k31" constant="true" id="k31" value="1"/>
<parameter name="k32" constant="true" id="k32" value="1"/>
<parameter name="k33" constant="true" id="k33" value="1"/>
<parameter name="k34" constant="true" id="k34" value="1"/>
<parameter name="k35" constant="true" id="k35" value="1"/>
<parameter name="k36" constant="true" id="k36" value="1"/>
<parameter name="k37" constant="true" id="k37" value="1"/>
<parameter name="k38" constant="true" id="k38" value="1"/>
<parameter name="k39" constant="true" id="k39" value="1"/>
<parameter name="k39a" constant="true" id="k39a" value="1"/>
<parameter name="k39b" constant="true" id="k39b" value="1"/>
<parameter name="k39c" constant="true" id="k39c" value="1"/>
<parameter name="k39d" constant="true" id="k39d" value="1"/>
<parameter name="k40" constant="true" id="k40" value="1"/>
<parameter name="k40a" constant="true" id="k40a" value="1"/>
<parameter name="k41" constant="true" id="k41" value="1"/>
<parameter name="k42" constant="true" id="k42" value="1"/>
<parameter name="k43" constant="true" id="k43" value="1"/>
<parameter name="k44" constant="true" id="k44" value="1"/>
<parameter name="k45" constant="true" id="k45" value="1"/>
<parameter name="k46" constant="true" id="k46" value="1"/>
<parameter name="k46a" constant="true" id="k46a" value="1"/>
<parameter name="k47" constant="true" id="k47" value="1"/>
<parameter name="k48" constant="true" id="k48" value="1"/>
<parameter name="k49" constant="true" id="k49" value="1"/>
<parameter name="k50" constant="true" id="k50" value="1"/>
<parameter name="k51" constant="true" id="k51" value="1"/>
<parameter name="k52" constant="true" id="k52" value="1"/>
<parameter name="k53" constant="true" id="k53" value="1"/>
</listOfParameters>
- <listOfReactions>
  - <reaction name="v1" id="v1" reversible="false">
    - <listOfProducts>
      <speciesReference stoichiometry="1" species="AC"/>
    </listOfProducts>
    - <kineticLaw>
      - <math xmlns="http://www.w3.org/1998/Math/MathML">
        <ci> k1 </ci>
      </math>
    </kineticLaw>
  </reaction>
  - <reaction name="v2" id="v2" reversible="false">
    - <listOfReactants>
      <speciesReference stoichiometry="1" species="AC"/>
      <speciesReference stoichiometry="1" species="Glu"/>
    </listOfReactants>
    - <listOfProducts>
      <speciesReference stoichiometry="1" species="Gly"/>
      <speciesReference stoichiometry="1" species="KGA"/>
    </listOfProducts>
    - <kineticLaw>
      - <math xmlns="http://www.w3.org/1998/Math/MathML">
        - <apply>

```



```

        <times/>
        <ci> k2 </ci>
        <ci> AC </ci>
        <ci> Glu </ci>
    </apply>
</math>
</kineticLaw>
</reaction>
- <reaction name="v3" id="v3" reversible="false">
  - <listOfReactants>
    <speciesReference stoichiometry="1" species="Gly"/>
  </listOfReactants>
  - <listOfProducts>
    <speciesReference stoichiometry="1" species="Ser"/>
  </listOfProducts>
  - <kineticLaw>
    - <math xmlns="http://www.w3.org/1998/Math/MathML">
      - <apply>
        <times/>
        <ci> k3 </ci>
        <ci> Gly </ci>
      </apply>
    </math>
  </kineticLaw>
</reaction>
- <reaction name="v4" id="v4" reversible="false">
  - <listOfReactants>
    <speciesReference stoichiometry="1" species="Ser"/>
  </listOfReactants>
  - <kineticLaw>
    - <math xmlns="http://www.w3.org/1998/Math/MathML">
      - <apply>
        <times/>
        <ci> k4 </ci>
        <ci> Ser </ci>
      </apply>
    </math>
  </kineticLaw>
</reaction>
- <reaction name="v5" id="v5" reversible="false">
  - <listOfReactants>
    <speciesReference stoichiometry="1" species="AC"/>
  </listOfReactants>
  - <listOfProducts>
    <speciesReference stoichiometry="1" species="Shikimate"/>
  </listOfProducts>
  - <kineticLaw>
    - <math xmlns="http://www.w3.org/1998/Math/MathML">
      - <apply>
        <times/>
        <ci> k5 </ci>
        <ci> AC </ci>
      </apply>
    </math>
  </kineticLaw>
</reaction>

```

```

        </math>
    </kineticLaw>
</reaction>
- <reaction name="v6" id="v6" reversible="false">
  - <listOfReactants>
    <speciesReference stoichiometry="1" species="Shikimate"/>
    <speciesReference stoichiometry="1" species="Glu"/>
  </listOfReactants>
  - <listOfProducts>
    <speciesReference stoichiometry="1" species="Phe"/>
    <speciesReference stoichiometry="1" species="KGA"/>
  </listOfProducts>
  - <kineticLaw>
    - <math xmlns="http://www.w3.org/1998/Math/MathML">
      - <apply>
        <times/>
        <ci> k6 </ci>
        <ci> Shikimate </ci>
        <ci> Glu </ci>
      </apply>
    </math>
  </kineticLaw>
</reaction>
- <reaction name="v7" id="v7" reversible="false">
  - <listOfReactants>
    <speciesReference stoichiometry="1" species="Phe"/>
  </listOfReactants>
  - <kineticLaw>
    - <math xmlns="http://www.w3.org/1998/Math/MathML">
      - <apply>
        <times/>
        <ci> k7 </ci>
        <ci> Phe </ci>
      </apply>
    </math>
  </kineticLaw>
</reaction>
- <reaction name="v8" id="v8" reversible="false">
  - <listOfReactants>
    <speciesReference stoichiometry="1" species="Shikimate"/>
    <speciesReference stoichiometry="1" species="Glu"/>
  </listOfReactants>
  - <listOfProducts>
    <speciesReference stoichiometry="1" species="Tyr"/>
    <speciesReference stoichiometry="1" species="KGA"/>
  </listOfProducts>
  - <kineticLaw>
    - <math xmlns="http://www.w3.org/1998/Math/MathML">
      - <apply>
        <times/>
        <ci> k8 </ci>
        <ci> Shikimate </ci>
        <ci> Glu </ci>

```

```

        </apply>
      </math>
    </kineticLaw>
  </reaction>
- <reaction name="v9" id="v9" reversible="false">
  - <listOfReactants>
    <speciesReference stoichiometry="1" species="Tyr"/>
  </listOfReactants>
  - <kineticLaw>
    - <math xmlns="http://www.w3.org/1998/Math/MathML">
      - <apply>
        <times/>
        <ci> k9 </ci>
        <ci> Tyr </ci>
      </apply>
    </math>
  </kineticLaw>
</reaction>
- <reaction name="v10" id="v10" reversible="false">
  - <listOfReactants>
    <speciesReference stoichiometry="1" species="Ser"/>
    <speciesReference stoichiometry="1" species="Shikimate"/>
    <speciesReference stoichiometry="1" species="Gln"/>
  </listOfReactants>
  - <listOfProducts>
    <speciesReference stoichiometry="1" species="AC"/>
    <speciesReference stoichiometry="1" species="Trp"/>
    <speciesReference stoichiometry="1" species="Pyr"/>
    <speciesReference stoichiometry="1" species="Glu"/>
  </listOfProducts>
  - <kineticLaw>
    - <math xmlns="http://www.w3.org/1998/Math/MathML">
      - <apply>
        <times/>
        <ci> k10 </ci>
        <ci> Shikimate </ci>
        <ci> Gln </ci>
        <ci> Ser </ci>
      </apply>
    </math>
  </kineticLaw>
</reaction>
- <reaction name="v11" id="v11" reversible="false">
  - <listOfReactants>
    <speciesReference stoichiometry="1" species="Trp"/>
  </listOfReactants>
  - <kineticLaw>
    - <math xmlns="http://www.w3.org/1998/Math/MathML">
      - <apply>
        <times/>
        <ci> k11 </ci>
        <ci> Trp </ci>
      </apply>
    </math>
  </kineticLaw>
</reaction>

```

```

        </math>
    </kineticLaw>
</reaction>
- <reaction name="v12" id="v12" reversible="false">
  - <listOfReactants>
    <speciesReference stoichiometry="1" species="AC"/>
  </listOfReactants>
  - <listOfProducts>
    <speciesReference stoichiometry="1" species="Suc"/>
  </listOfProducts>
  - <kineticLaw>
    - <math xmlns="http://www.w3.org/1998/Math/MathML">
      - <apply>
        <times/>
        <ci> k12 </ci>
        <ci> AC </ci>
      </apply>
    </math>
  </kineticLaw>
</reaction>
- <reaction name="v13" id="v13" reversible="false">
  - <listOfReactants>
    <speciesReference stoichiometry="1" species="Suc"/>
    <speciesReference stoichiometry="1" species="Gol"/>
  </listOfReactants>
  - <listOfProducts>
    <speciesReference stoichiometry="1" species="Raf"/>
  </listOfProducts>
  - <kineticLaw>
    - <math xmlns="http://www.w3.org/1998/Math/MathML">
      - <apply>
        <times/>
        <ci> k13 </ci>
        <ci> Suc </ci>
        <ci> Gol </ci>
      </apply>
    </math>
  </kineticLaw>
</reaction>
- <reaction name="v14" id="v14" reversible="false">
  - <listOfReactants>
    <speciesReference stoichiometry="1" species="Raf"/>
  </listOfReactants>
  - <listOfProducts>
    <speciesReference stoichiometry="1" species="Fru"/>
    <speciesReference stoichiometry="1" species="Mel"/>
  </listOfProducts>
  - <kineticLaw>
    - <math xmlns="http://www.w3.org/1998/Math/MathML">
      - <apply>
        <times/>
        <ci> k14 </ci>
        <ci> Raf </ci>
      </apply>
    </math>
  </kineticLaw>
</reaction>

```

```

        </apply>
      </math>
    </kineticLaw>
  </reaction>
- <reaction name="v15" id="v15" reversible="false">
  - <listOfReactants>
    <speciesReference stoichiometry="1" species="Mel"/>
  </listOfReactants>
  - <listOfProducts>
    <speciesReference stoichiometry="1" species="Glc"/>
    <speciesReference stoichiometry="1" species="Gal"/>
  </listOfProducts>
  - <kineticLaw>
    - <math xmlns="http://www.w3.org/1998/Math/MathML">
      - <apply>
        <times/>
        <ci> k15 </ci>
        <ci> Mel </ci>
      </apply>
    </math>
  </kineticLaw>
</reaction>
- <reaction name="v16" id="v16" reversible="false">
  - <listOfReactants>
    <speciesReference stoichiometry="1" species="Gal"/>
  </listOfReactants>
  - <listOfProducts>
    <speciesReference stoichiometry="1" species="AC"/>
  </listOfProducts>
  - <kineticLaw>
    - <math xmlns="http://www.w3.org/1998/Math/MathML">
      - <apply>
        <times/>
        <ci> k16 </ci>
        <ci> Gal </ci>
      </apply>
    </math>
  </kineticLaw>
</reaction>
- <reaction name="v17" id="v17" reversible="false">
  - <listOfReactants>
    <speciesReference stoichiometry="1" species="Glc"/>
  </listOfReactants>
  - <listOfProducts>
    <speciesReference stoichiometry="1" species="AC"/>
  </listOfProducts>
  - <kineticLaw>
    - <math xmlns="http://www.w3.org/1998/Math/MathML">
      - <apply>
        <times/>
        <ci> k17 </ci>
        <ci> Glc </ci>
      </apply>
    </math>
  </kineticLaw>
</reaction>

```

```

    </math>
  </kineticLaw>
</reaction>
- <reaction name="v18" id="v18" reversible="false">
  - <listOfReactants>
    <speciesReference stoichiometry="1" species="Suc"/>
  </listOfReactants>
  - <listOfProducts>
    <speciesReference stoichiometry="1" species="Fru"/>
    <speciesReference stoichiometry="1" species="Glc"/>
  </listOfProducts>
  - <kineticLaw>
    - <math xmlns="http://www.w3.org/1998/Math/MathML">
      - <apply>
        <times/>
        <ci> k18 </ci>
        <ci> Suc </ci>
      </apply>
    </math>
  </kineticLaw>
</reaction>
- <reaction name="v19" id="v19" reversible="false">
  - <listOfReactants>
    <speciesReference stoichiometry="1" species="Fru"/>
  </listOfReactants>
  - <listOfProducts>
    <speciesReference stoichiometry="1" species="AC"/>
  </listOfProducts>
  - <kineticLaw>
    - <math xmlns="http://www.w3.org/1998/Math/MathML">
      - <apply>
        <times/>
        <ci> k19 </ci>
        <ci> Fru </ci>
      </apply>
    </math>
  </kineticLaw>
</reaction>
- <reaction name="v20" id="v20" reversible="false">
  - <listOfReactants>
    <speciesReference stoichiometry="1" species="AC"/>
    <speciesReference stoichiometry="1" species="myoIn"/>
  </listOfReactants>
  - <listOfProducts>
    <speciesReference stoichiometry="1" species="Gol"/>
  </listOfProducts>
  - <kineticLaw>
    - <math xmlns="http://www.w3.org/1998/Math/MathML">
      - <apply>
        <times/>
        <ci> k20 </ci>
        <ci> myoIn </ci>
        <ci> AC </ci>
      </apply>
    </math>
  </kineticLaw>
</reaction>

```

```

        </apply>
      </math>
    </kineticLaw>
  </reaction>
- <reaction name="v21" id="v21" reversible="false">
  - <listOfReactants>
    <speciesReference stoichiometry="1" species="AC"/>
    <speciesReference stoichiometry="1" species="myoIn"/>
  </listOfReactants>
  - <listOfProducts>
    <speciesReference stoichiometry="1" species="Asc"/>
  </listOfProducts>
  - <kineticLaw>
    - <math xmlns="http://www.w3.org/1998/Math/MathML">
      - <apply>
        <times/>
        <ci> k21 </ci>
        <ci> myoIn </ci>
        <ci> AC </ci>
      </apply>
    </math>
  </kineticLaw>
</reaction>
- <reaction name="v22" id="v22" reversible="false">
  - <listOfReactants>
    <speciesReference stoichiometry="1" species="Asc"/>
  </listOfReactants>
  - <kineticLaw>
    - <math xmlns="http://www.w3.org/1998/Math/MathML">
      - <apply>
        <times/>
        <ci> k22 </ci>
        <ci> Asc </ci>
      </apply>
    </math>
  </kineticLaw>
</reaction>
- <reaction name="v23" id="v23" reversible="false">
  - <listOfReactants>
    <speciesReference stoichiometry="1" species="AC"/>
  </listOfReactants>
  - <listOfProducts>
    <speciesReference stoichiometry="1" species="Pyr"/>
  </listOfProducts>
  - <kineticLaw>
    - <math xmlns="http://www.w3.org/1998/Math/MathML">
      - <apply>
        <times/>
        <ci> k23 </ci>
        <ci> AC </ci>
      </apply>
    </math>
  </kineticLaw>

```

```

</reaction>
- <reaction name="v24" id="v24" reversible="false">
  - <listOfReactants>
    <speciesReference stoichiometry="1" species="Pyr"/>
    <speciesReference stoichiometry="1" species="Glu"/>
  </listOfReactants>
  - <listOfProducts>
    <speciesReference stoichiometry="1" species="Val"/>
    <speciesReference stoichiometry="1" species="KGA"/>
  </listOfProducts>
  - <kineticLaw>
    - <math xmlns="http://www.w3.org/1998/Math/MathML">
      - <apply>
        <times/>
        <ci> k24 </ci>
        <ci> Pyr </ci>
        <ci> Glu </ci>
      </apply>
    </math>
  </kineticLaw>
</reaction>
- <reaction name="v25" id="v25" reversible="false">
  - <listOfReactants>
    <speciesReference stoichiometry="1" species="Pyr"/>
    <speciesReference stoichiometry="1" species="Val"/>
  </listOfReactants>
  - <listOfProducts>
    <speciesReference stoichiometry="1" species="Ala"/>
  </listOfProducts>
  - <kineticLaw>
    - <math xmlns="http://www.w3.org/1998/Math/MathML">
      - <apply>
        <times/>
        <ci> k25 </ci>
        <ci> Pyr </ci>
      </apply>
    </math>
  </kineticLaw>
</reaction>
- <reaction name="v26" id="v26" reversible="false">
  - <listOfReactants>
    <speciesReference stoichiometry="1" species="Val"/>
  </listOfReactants>
  - <kineticLaw>
    - <math xmlns="http://www.w3.org/1998/Math/MathML">
      - <apply>
        <times/>
        <ci> k26 </ci>
        <ci> Val </ci>
      </apply>
    </math>
  </kineticLaw>
</reaction>

```



```

- <reaction name="v27" id="v27" reversible="false">
  - <listOfReactants>
    <speciesReference stoichiometry="1" species="Pyr"/>
    <speciesReference stoichiometry="1" species="Glu"/>
  </listOfReactants>
  - <listOfProducts>
    <speciesReference stoichiometry="1" species="Leu"/>
    <speciesReference stoichiometry="1" species="KGA"/>
  </listOfProducts>
  - <kineticLaw>
    - <math xmlns="http://www.w3.org/1998/Math/MathML">
      - <apply>
        <times/>
        <ci> k27 </ci>
        <ci> Pyr </ci>
        <ci> Glu </ci>
      </apply>
    </math>
  </kineticLaw>
</reaction>
- <reaction name="v28" id="v28" reversible="false">
  - <listOfReactants>
    <speciesReference stoichiometry="1" species="Leu"/>
  </listOfReactants>
  - <kineticLaw>
    - <math xmlns="http://www.w3.org/1998/Math/MathML">
      - <apply>
        <times/>
        <ci> k28 </ci>
        <ci> Leu </ci>
      </apply>
    </math>
  </kineticLaw>
</reaction>
- <reaction name="v29" id="v29" reversible="false">
  - <listOfReactants>
    <speciesReference stoichiometry="1" species="Ala"/>
  </listOfReactants>
  - <kineticLaw>
    - <math xmlns="http://www.w3.org/1998/Math/MathML">
      - <apply>
        <times/>
        <ci> k29 </ci>
        <ci> Ala </ci>
      </apply>
    </math>
  </kineticLaw>
</reaction>
- <reaction name="v30" id="v30" reversible="false">
  - <listOfReactants>
    <speciesReference stoichiometry="1" species="Pyr"/>
    <speciesReference stoichiometry="1" species="Oxac"/>
  </listOfReactants>

```

```

- <listOfProducts>
  <speciesReference stoichiometry="1" species="Cit"/>
</listOfProducts>
- <kineticLaw>
  - <math xmlns="http://www.w3.org/1998/Math/MathML">
    - <apply>
      <times/>
      <ci> k30 </ci>
      <ci> Pyr </ci>
      <ci> Oxac </ci>
    </apply>
  </math>
</kineticLaw>
</reaction>
- <reaction name="v31" id="v31" reversible="false">
  - <listOfReactants>
    <speciesReference stoichiometry="1" species="Cit"/>
  </listOfReactants>
  - <listOfProducts>
    <speciesReference stoichiometry="1" species="KGA"/>
  </listOfProducts>
  - <kineticLaw>
    - <math xmlns="http://www.w3.org/1998/Math/MathML">
      - <apply>
        <times/>
        <ci> k31 </ci>
        <ci> Cit </ci>
      </apply>
    </math>
  </kineticLaw>
</reaction>
- <reaction name="v32" id="v32" reversible="false">
  - <listOfReactants>
    <speciesReference stoichiometry="1" species="KGA"/>
  </listOfReactants>
  - <listOfProducts>
    <speciesReference stoichiometry="1" species="Succ"/>
  </listOfProducts>
  - <kineticLaw>
    - <math xmlns="http://www.w3.org/1998/Math/MathML">
      - <apply>
        <times/>
        <ci> k32 </ci>
        <ci> KGA </ci>
      </apply>
    </math>
  </kineticLaw>
</reaction>
- <reaction name="v33" id="v33" reversible="false">
  - <listOfReactants>
    <speciesReference stoichiometry="1" species="Succ"/>
  </listOfReactants>
  - <listOfProducts>

```

```

        <speciesReference stoichiometry="1" species="Fum"/>
    </listOfProducts>
    - <kineticLaw>
        - <math xmlns="http://www.w3.org/1998/Math/MathML">
            - <apply>
                <times/>
                <ci> k33 </ci>
                <ci> Succ </ci>
            </apply>
        </math>
    </kineticLaw>
</reaction>
- <reaction name="v34" id="v34" reversible="false">
    - <listOfReactants>
        <speciesReference stoichiometry="1" species="Fum"/>
    </listOfReactants>
    - <listOfProducts>
        <speciesReference stoichiometry="1" species="Mal"/>
    </listOfProducts>
    - <kineticLaw>
        - <math xmlns="http://www.w3.org/1998/Math/MathML">
            - <apply>
                <times/>
                <ci> k34 </ci>
                <ci> Fum </ci>
            </apply>
        </math>
    </kineticLaw>
</reaction>
- <reaction name="v35" id="v35" reversible="false">
    - <listOfReactants>
        <speciesReference stoichiometry="1" species="Mal"/>
    </listOfReactants>
    - <listOfProducts>
        <speciesReference stoichiometry="1" species="Oxac"/>
    </listOfProducts>
    - <kineticLaw>
        - <math xmlns="http://www.w3.org/1998/Math/MathML">
            - <apply>
                <times/>
                <ci> k35 </ci>
                <ci> Mal </ci>
            </apply>
        </math>
    </kineticLaw>
</reaction>
- <reaction name="v36" id="v36" reversible="false">
    - <listOfReactants>
        <speciesReference stoichiometry="1" species="Oxac"/>
        <speciesReference stoichiometry="1" species="Glu"/>
    </listOfReactants>
    - <listOfProducts>
        <speciesReference stoichiometry="1" species="Asp"/>

```

```

        <speciesReference stoichiometry="1" species="KGA"/>
    </listOfProducts>
- <kineticLaw>
    - <math xmlns="http://www.w3.org/1998/Math/MathML">
        - <apply>
            <times/>
            <ci> k36 </ci>
            <ci> Oxac </ci>
            <ci> Glu </ci>
        </apply>
    </math>
</kineticLaw>
</reaction>
- <reaction name="v37" id="v37" reversible="false">
    - <listOfReactants>
        <speciesReference stoichiometry="1" species="Asp"/>
        <speciesReference stoichiometry="1" species="Gln"/>
    </listOfReactants>
    - <listOfProducts>
        <speciesReference stoichiometry="1" species="Asn"/>
        <speciesReference stoichiometry="1" species="Glu"/>
    </listOfProducts>
    - <kineticLaw>
        - <math xmlns="http://www.w3.org/1998/Math/MathML">
            - <apply>
                <times/>
                <ci> k37 </ci>
                <ci> Asp </ci>
                <ci> Gln </ci>
            </apply>
        </math>
    </kineticLaw>
</reaction>
- <reaction name="v38" id="v38" reversible="false">
    - <listOfReactants>
        <speciesReference stoichiometry="1" species="Asn"/>
    </listOfReactants>
    - <kineticLaw>
        - <math xmlns="http://www.w3.org/1998/Math/MathML">
            - <apply>
                <times/>
                <ci> k38 </ci>
                <ci> Asn </ci>
            </apply>
        </math>
    </kineticLaw>
</reaction>
- <reaction name="v39" id="v39" reversible="false">
    - <listOfReactants>
        <speciesReference stoichiometry="1" species="Asp"/>
    </listOfReactants>
    - <listOfProducts>
        <speciesReference stoichiometry="1" species="Thr"/>

```

```

</listOfProducts>
- <kineticLaw>
  - <math xmlns="http://www.w3.org/1998/Math/MathML">
    - <apply>
      <times/>
      <ci> k39 </ci>
      <ci> Asp </ci>
    </apply>
  </math>
</kineticLaw>
</reaction>
- <reaction name="v39a" id="v39a" reversible="false">
  - <listOfReactants>
    <speciesReference stoichiometry="1" species="Asp"/>
  </listOfReactants>
  - <listOfProducts>
    <speciesReference stoichiometry="1" species="Lys"/>
  </listOfProducts>
  - <kineticLaw>
    - <math xmlns="http://www.w3.org/1998/Math/MathML">
      - <apply>
        <times/>
        <ci> k39a </ci>
        <ci> Asp </ci>
      </apply>
    </math>
  </kineticLaw>
</reaction>
- <reaction name="v39b" id="v39b" reversible="false">
  - <listOfReactants>
    <speciesReference stoichiometry="1" species="Lys"/>
  </listOfReactants>
  - <kineticLaw>
    - <math xmlns="http://www.w3.org/1998/Math/MathML">
      - <apply>
        <times/>
        <ci> k39b </ci>
        <ci> Lys </ci>
      </apply>
    </math>
  </kineticLaw>
</reaction>
- <reaction name="v39c" id="v39c" reversible="false">
  - <listOfReactants>
    <speciesReference stoichiometry="1" species="Asp"/>
  </listOfReactants>
  - <listOfProducts>
    <speciesReference stoichiometry="1" species="Met"/>
  </listOfProducts>
  - <kineticLaw>
    - <math xmlns="http://www.w3.org/1998/Math/MathML">
      - <apply>
        <times/>

```

```

                <ci> k39c </ci>
                <ci> Asp </ci>
            </apply>
        </math>
    </kineticLaw>
</reaction>
- <reaction name="v39d" id="v39d" reversible="false">
    - <listOfReactants>
        <speciesReference stoichiometry="1" species="Met"/>
    </listOfReactants>
    - <kineticLaw>
        - <math xmlns="http://www.w3.org/1998/Math/MathML">
            - <apply>
                <times/>
                <ci> k39d </ci>
                <ci> Met </ci>
            </apply>
        </math>
    </kineticLaw>
</reaction>
- <reaction name="v40" id="v40" reversible="false">
    - <listOfReactants>
        <speciesReference stoichiometry="1" species="Thr"/>
        <speciesReference stoichiometry="1" species="Glu"/>
    </listOfReactants>
    - <listOfProducts>
        <speciesReference stoichiometry="1" species="Ile"/>
        <speciesReference stoichiometry="1" species="KGA"/>
    </listOfProducts>
    - <kineticLaw>
        - <math xmlns="http://www.w3.org/1998/Math/MathML">
            - <apply>
                <times/>
                <ci> k40 </ci>
                <ci> Thr </ci>
                <ci> Glu </ci>
            </apply>
        </math>
    </kineticLaw>
</reaction>
- <reaction name="v40a" id="v40a" reversible="false">
    - <listOfReactants>
        <speciesReference stoichiometry="1" species="Ile"/>
        <speciesReference stoichiometry="1" species="KGA"/>
    </listOfReactants>
    - <listOfProducts>
        <speciesReference stoichiometry="1" species="Glu"/>
    </listOfProducts>
    - <kineticLaw>
        - <math xmlns="http://www.w3.org/1998/Math/MathML">
            - <apply>
                <times/>
                <ci> k40a </ci>
            </apply>
        </math>
    </kineticLaw>
</reaction>

```

```

                <ci> Ile </ci>
                <ci> KGA </ci>
            </apply>
        </math>
    </kineticLaw>
</reaction>
- <reaction name="v41" id="v41" reversible="false">
    - <listOfReactants>
        <speciesReference stoichiometry="1" species="KGA"/>
    </listOfReactants>
    - <listOfProducts>
        <speciesReference stoichiometry="1" species="Glu"/>
    </listOfProducts>
    - <kineticLaw>
        - <math xmlns="http://www.w3.org/1998/Math/MathML">
            - <apply>
                <times/>
                <ci> k41 </ci>
                <ci> KGA </ci>
            </apply>
        </math>
    </kineticLaw>
</reaction>
- <reaction name="v42" id="v42" reversible="false">
    - <listOfReactants>
        <speciesReference stoichiometry="1" species="Glu"/>
    </listOfReactants>
    - <listOfProducts>
        <speciesReference stoichiometry="1" species="Gln"/>
    </listOfProducts>
    - <kineticLaw>
        - <math xmlns="http://www.w3.org/1998/Math/MathML">
            - <apply>
                <times/>
                <ci> k42 </ci>
                <ci> Glu </ci>
            </apply>
        </math>
    </kineticLaw>
</reaction>
- <reaction name="v43" id="v43" reversible="false">
    - <listOfReactants>
        <speciesReference stoichiometry="1" species="Gln"/>
    </listOfReactants>
    - <kineticLaw>
        - <math xmlns="http://www.w3.org/1998/Math/MathML">
            - <apply>
                <times/>
                <ci> k43 </ci>
                <ci> Gln </ci>
            </apply>
        </math>
    </kineticLaw>

```

```

</reaction>
- <reaction name="v44" id="v44" reversible="false">
  - <listOfReactants>
    <speciesReference stoichiometry="1" species="Glu"/>
  </listOfReactants>
  - <listOfProducts>
    <speciesReference stoichiometry="1" species="Pro"/>
  </listOfProducts>
  - <kineticLaw>
    - <math xmlns="http://www.w3.org/1998/Math/MathML">
      - <apply>
        <times/>
        <ci> k44 </ci>
        <ci> Glu </ci>
      </apply>
    </math>
  </kineticLaw>
</reaction>
- <reaction name="v45" id="v45" reversible="false">
  - <listOfReactants>
    <speciesReference stoichiometry="1" species="Pro"/>
  </listOfReactants>
  - <kineticLaw>
    - <math xmlns="http://www.w3.org/1998/Math/MathML">
      - <apply>
        <times/>
        <ci> k45 </ci>
        <ci> Pro </ci>
      </apply>
    </math>
  </kineticLaw>
</reaction>
- <reaction name="v46" id="v46" reversible="false">
  - <listOfReactants>
    <speciesReference stoichiometry="2" species="Glu"/>
  </listOfReactants>
  - <listOfProducts>
    <speciesReference stoichiometry="1" species="KGA"/>
    <speciesReference stoichiometry="1" species="Orn"/>
  </listOfProducts>
  - <kineticLaw>
    - <math xmlns="http://www.w3.org/1998/Math/MathML">
      - <apply>
        <times/>
        <ci> k46 </ci>
        <ci> Glu </ci>
      </apply>
    </math>
  </kineticLaw>
</reaction>
- <reaction name="v46a" id="v46a" reversible="false">
  - <listOfReactants>
    <speciesReference stoichiometry="1" species="Asp"/>

```



```

        <speciesReference stoichiometry="1" species="Orn"/>
    </listOfReactants>
- <listOfProducts>
    <speciesReference stoichiometry="1" species="Fum"/>
    <speciesReference stoichiometry="1" species="Arg"/>
</listOfProducts>
- <kineticLaw>
    - <math xmlns="http://www.w3.org/1998/Math/MathML">
        - <apply>
            <times/>
            <ci> k46a </ci>
            <ci> Orn </ci>
            <ci> Asp </ci>
        </apply>
    </math>
</kineticLaw>
</reaction>
- <reaction name="v47" id="v47" reversible="false">
    - <listOfReactants>
        <speciesReference stoichiometry="1" species="Arg"/>
    </listOfReactants>
    - <listOfProducts>
        <speciesReference stoichiometry="1" species="Put"/>
    </listOfProducts>
    - <kineticLaw>
        - <math xmlns="http://www.w3.org/1998/Math/MathML">
            - <apply>
                <times/>
                <ci> k47 </ci>
                <ci> Arg </ci>
            </apply>
        </math>
    </kineticLaw>
</reaction>
- <reaction name="v48" id="v48" reversible="false">
    - <listOfReactants>
        <speciesReference stoichiometry="1" species="Put"/>
    </listOfReactants>
    - <listOfProducts>
        <speciesReference stoichiometry="1" species="Spdine"/>
    </listOfProducts>
    - <kineticLaw>
        - <math xmlns="http://www.w3.org/1998/Math/MathML">
            - <apply>
                <times/>
                <ci> k48 </ci>
                <ci> Put </ci>
            </apply>
        </math>
    </kineticLaw>
</reaction>
- <reaction name="v49" id="v49" reversible="false">
    - <listOfReactants>

```

```

        <speciesReference stoichiometry="1" species="Put"/>
    </listOfReactants>
    - <listOfProducts>
        <speciesReference stoichiometry="1" species="Succ"/>
    </listOfProducts>
    - <kineticLaw>
        - <math xmlns="http://www.w3.org/1998/Math/MathML">
            - <apply>
                <times/>
                <ci> k49 </ci>
                <ci> Put </ci>
            </apply>
        </math>
    </kineticLaw>
</reaction>
- <reaction name="v50" id="v50" reversible="false">
    - <listOfReactants>
        <speciesReference stoichiometry="1" species="Spdine"/>
    </listOfReactants>
    - <listOfProducts>
        <speciesReference stoichiometry="1" species="Put"/>
    </listOfProducts>
    - <kineticLaw>
        - <math xmlns="http://www.w3.org/1998/Math/MathML">
            - <apply>
                <times/>
                <ci> k50 </ci>
                <ci> Spdine </ci>
            </apply>
        </math>
    </kineticLaw>
</reaction>
- <reaction name="v51" id="v51" reversible="false">
    - <listOfReactants>
        <speciesReference stoichiometry="1" species="Spdine"/>
    </listOfReactants>
    - <kineticLaw>
        - <math xmlns="http://www.w3.org/1998/Math/MathML">
            - <apply>
                <times/>
                <ci> k51 </ci>
                <ci> Spdine </ci>
            </apply>
        </math>
    </kineticLaw>
</reaction>
- <reaction name="v52" id="v52" reversible="false">
    - <listOfReactants>
        <speciesReference stoichiometry="1" species="Suc"/>
    </listOfReactants>
    - <kineticLaw>
        - <math xmlns="http://www.w3.org/1998/Math/MathML">
            - <apply>

```

```

        <times/>
        <ci> k52 </ci>
        <ci> Suc </ci>
    </apply>
</math>
</kineticLaw>
</reaction>
- <reaction name="v53" id="v53" reversible="false">
  - <listOfProducts>
    <speciesReference stoichiometry="1" species="myoIn"/>
  </listOfProducts>
  - <listOfModifiers>
    <modifierSpeciesReference species="AC"/>
  </listOfModifiers>
  - <kineticLaw>
    - <math xmlns="http://www.w3.org/1998/Math/MathML">
      - <apply>
        <times/>
        <ci> k53 </ci>
        <ci> AC </ci>
      </apply>
    </math>
  </kineticLaw>
</reaction>
</listOfReactions>
</model>
</sbml>

```
